# Supplementary material for: Thymosin alpha 1 in the prevention of infected pancreatic necrosis following acute necrotising pancreatitis (TRACE trial): protocol of a multicentre, randomised, double-blind, placebo-controlled, parallel-group trial
Source: PubMed Central journal article supplement — BMJ Open. 2020 Sep 29;10(9):e037231. doi: 10.1136/bmjopen-2020-037231 (PMC7526289; doi:10.1136/bmjopen-2020-037231), 2020-09-29
Supplement: bmjopen-2020-037231.draft_revisions.pdf [file bmjopen-2020-037231.draft_revisions.pdf]

# BMJ Open

BMJ Open is committed to open peer review. As part of this commitment we make the peer review history of every article we publish publicly available.

When an article is published we post the peer reviewers' comments and the authors' responses online. We also post the versions of the paper that were used during peer review. These are the versions that the peer review comments apply to.

The versions of the paper that follow are the versions that were submitted during the peer review process. They are not the versions of record or the final published versions. They should not be cited or distributed as the published version of this manuscript.

BMJ Open is an open access journal and the full, final, typeset and author-corrected version of record of the manuscript is available on our site with no access controls, subscription charges or pay-per-view fees (<http://bmjopen.bmj.com>).

If you have any questions on BMJ Open's open peer review process please email [info.bmjopen@bmj.com](mailto:info.bmjopen@bmj.com)

# BMJ Open

**Thymosin alpha 1 in the prevention of pancreatic infection following acute necrotizing pancreatitis (TRACE trial): protocol of a multicenter, randomized, double-blind, placebo-controlled, parallel-group, trial**

|                               |                                                                                                                                                                                                                                                                                                                                                                                                                                                                                                                                                                                                                                                                                                                                                                                                                                                                                                                                                                                                                               |
|-------------------------------|-------------------------------------------------------------------------------------------------------------------------------------------------------------------------------------------------------------------------------------------------------------------------------------------------------------------------------------------------------------------------------------------------------------------------------------------------------------------------------------------------------------------------------------------------------------------------------------------------------------------------------------------------------------------------------------------------------------------------------------------------------------------------------------------------------------------------------------------------------------------------------------------------------------------------------------------------------------------------------------------------------------------------------|
| Journal:                      | <i>BMJ Open</i>                                                                                                                                                                                                                                                                                                                                                                                                                                                                                                                                                                                                                                                                                                                                                                                                                                                                                                                                                                                                               |
| Manuscript ID                 | bmjopen-2020-037231                                                                                                                                                                                                                                                                                                                                                                                                                                                                                                                                                                                                                                                                                                                                                                                                                                                                                                                                                                                                           |
| Article Type:                 | Protocol                                                                                                                                                                                                                                                                                                                                                                                                                                                                                                                                                                                                                                                                                                                                                                                                                                                                                                                                                                                                                      |
| Date Submitted by the Author: | 24-Jan-2020                                                                                                                                                                                                                                                                                                                                                                                                                                                                                                                                                                                                                                                                                                                                                                                                                                                                                                                                                                                                                   |
| Complete List of Authors:     | Zhou, Jing; Jinling Hospital, Department of General Surgery, Jinling Hospital, Nanjing University School of Medicine<br>Mao, Wenjian; Jinling Hospital, Department of General Surgery, Jinling Hospital, Nanjing Medical University School of Medicine<br>Ke, Lu; Jinling Hospital, Department of General Surgery, Jinling Hospital, Nanjing University School of Medicine<br>Chen, T; Liverpool School of Tropical Medicine, Department of Clinical Sciences<br>He, Wenhua; The First Affiliated Hospital of Nanchang University, Pan, Xinting; The Affiliated Hospital of Qingdao University, Department of Emergency Intensive Care Unit, The Affiliated Hospital of Qingdao University,<br>Chen, Miao<br>He, Chengjian<br>Gu, Weili<br>Song, Jingchun<br>Ni, Haibin<br>Tu, Jianfeng<br>Sun, Junli<br>Zhang, Guoxiu<br>Chen, Weiwei<br>Xue, Bing<br>Zhao, Xiangyang<br>Shao, Min<br>Liu, Yuxiu<br>Tong, Zhihui; Jinling Hospital, Nanjing University School of Medicine, SICU, department of General Surgery<br>Li, Weiqin |
| Keywords:                     | Pancreatic disease < GASTROENTEROLOGY, IMMUNOLOGY, INFECTIOUS DISEASES                                                                                                                                                                                                                                                                                                                                                                                                                                                                                                                                                                                                                                                                                                                                                                                                                                                                                                                                                        |
|                               |                                                                                                                                                                                                                                                                                                                                                                                                                                                                                                                                                                                                                                                                                                                                                                                                                                                                                                                                                                                                                               |

1  
2  
3  
4  
5  
6  
7  
8  
9  
10  
11  
12  
13  
14  
15  
16  
17  
18  
19  
20  
21  
22  
23  
24  
25  
26  
27  
28  
29  
30  
31  
32  
33  
34  
35  
36  
37  
38  
39  
40  
41  
42  
43  
44  
45  
46  
47  
48  
49  
50  
51  
52  
53  
54  
55  
56  
57  
58  
59  
60

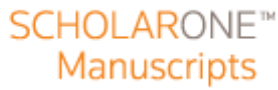

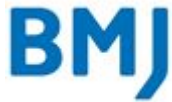

I, the Submitting Author has the right to grant and does grant on behalf of all authors of the Work (as defined in the below author licence), an exclusive licence and/or a non-exclusive licence for contributions from authors who are: i) UK Crown employees; ii) where BMJ has agreed a CC-BY licence shall apply, and/or iii) in accordance with the terms applicable for US Federal Government officers or employees acting as part of their official duties; on a worldwide, perpetual, irrevocable, royalty-free basis to BMJ Publishing Group Ltd ("BMJ") its licensees and where the relevant Journal is co-owned by BMJ to the co-owners of the Journal, to publish the Work in this journal and any other BMJ products and to exploit all rights, as set out in our [licence](#).

The Submitting Author accepts and understands that any supply made under these terms is made by BMJ to the Submitting Author unless you are acting as an employee on behalf of your employer or a postgraduate student of an affiliated institution which is paying any applicable article publishing charge ("APC") for Open Access articles. Where the Submitting Author wishes to make the Work available on an Open Access basis (and intends to pay the relevant APC), the terms of reuse of such Open Access shall be governed by a Creative Commons licence – details of these licences and which [Creative Commons](#) licence will apply to this Work are set out in our licence referred to above.

Other than as permitted in any relevant BMJ Author's Self Archiving Policies, I confirm this Work has not been accepted for publication elsewhere, is not being considered for publication elsewhere and does not duplicate material already published. I confirm all authors consent to publication of this Work and authorise the granting of this licence.

1  
2  
3  
4 Thymosin alpha 1 in the prevention of pancreatic infection following  
5  
6 acute necrotizing pancreatitis (TRACE trial): protocol of a multicenter,  
7  
8 randomized, double-blind, placebo-controlled, parallel-group, trial  
9  
10

11 Jing Zhou<sup>1, a</sup>, Wenjian Mao<sup>2,a</sup>, Lu Ke<sup>1\*</sup>, Tao Chen<sup>3</sup>, Wenhua He<sup>4</sup>, Xinting Pan<sup>5</sup>, Miao Chen<sup>6</sup>,  
12 Chengjian He<sup>7</sup>, Weili Gu<sup>8</sup>, Jingyi Wu<sup>9</sup>, Jingchun Song<sup>10</sup>, Haibin Ni<sup>11</sup>, Jianfeng Tu<sup>12</sup>, Junli Sun<sup>13</sup>,  
13 Guoxiu Zhang<sup>14</sup>, Weiwei Chen<sup>15</sup>, Bing Xue<sup>16</sup>, Xiangyang Zhao<sup>17</sup>, Ming Shao<sup>18</sup>, Yuxiu Liu<sup>19</sup>, Zhihui  
14 Tong<sup>1\*</sup>, Weiqin Li<sup>1</sup>, for the Chinese Acute Pancreatitis Clinical Trials Group (CAPCTG)  
15  
16

17  
18  
19 1 Department of General Surgery, Jinling Hospital, Nanjing University School of Medicine, Nanjing  
20 210002, Jiangsu Province, China  
21  
22

23 2 Department of General Surgery, Jinling Hospital, Nanjing Medical University School of Medicine,  
24 Nanjing 210002, Jiangsu Province, China  
25  
26

27 3 Tropical Clinical Trials Unit, Department of Clinical Sciences, Liverpool School of Tropical Medicine.  
28 Liverpool, L3 5QA, UK  
29  
30

31 4 Department of Gastroenterology, Medical College of Nanchang University, Nanchang 330006,  
32 Jiangxi Province, China.  
33  
34

35 5 Department of Emergency Intensive Care Unit, The Affiliated Hospital of Qingdao University,  
36 Qingdao, 266000, Shandong Province, China  
37  
38

39 6 Department of Intensive Care Unit, Affiliated Hospital of Zunyi Medical College, Zunyi 63000,  
40 Guizhou Province, China.  
41  
42

43 7 Department of Intensive Care Unit of the Affiliated Nanhua Hospital, University of South China,  
44 Hengyang 421001, Hunan Province, China.  
45  
46

47 8 Department of Intensive care Unit of the Second Affiliated Hospital of Nantong University,  
48 Nantong 226001, Jiangsu Province, China  
49  
50

51 9 Department of Intensive Care Unit of the Yijishan Hospital of Wannan Medical College, Wuhu  
52 241000, Anhui Province, China.  
53  
54

55 10 Department of Intensive Care Unit, the 908<sup>th</sup> Hospital of Chinese People's Liberation Army Joint  
56 Logistic Support Force, Nanchang 330006, Jiangxi Province, China  
57  
58

59 11 Department of Emergency, Jiangsu Province Hospital on Integration of Chinese and Western  
60 Medicine, Nanjing 210010, Jiangsu Province, China

1  
2  
3  
4 12Department of Emergency Medicine, Zhejiang Provincial People's Hospital, Hangzhou Medical  
5 College, Hangzhou 310014,Zhejiang Province,China

6  
7 13 Department of Intensive Care Unit, Luoyang Central Hospital,Luoyan 471100,Henan  
8 Province,China

9  
10 14 Department of Intensive Care Unit, The Affiliated Hospital of Henan University of Science and  
11 Technology,Luoyan 471100, Henan Province,China

12  
13 15 Department of Gastroenterology, Clinical Medical College of Yangzhou University,  
14 Yangzhou225009,Jiangsu Province,China

15  
16 16 Department of Emergency Intensive Care Unit, The First People's Hospital of  
17 Shangqiu,Shangqiu 476100,Henan Province,China

18  
19 17 Department of Intensive Care Unit,Qilu Hospital of Shandong University, Qingdao 266000,  
20 Shandong Province, China

21  
22 18 Department of Intensive Care Unit, The First Affiliated Hospital of Anhui Medical  
23 University,Hefei 230022,Anhui Province, China

24  
25 19 Department of Medical Statistics,Jinling Hospital, Nanjing University School of Medicine,  
26 Nanjing 210002, Jiangsu Province, China

27  
28 \*Correspondence to: Lu Ke & Zhihui Tong, Department of General Surgery, Jinling Hospital,  
29 Nanjing University School of Medicine, Nanjing 210002, Jiangsu Province, China

30  
31 Telephone: +8613182810702 Fax: +86-25-84803956

32  
33 E-mail: kkb9832@gmail.com

34  
35 a These authors contributed equally to this work

## Abstract

**Introduction:** Infected pancreatic necrosis (IPN) and its related septic complications are the major causes of death in patients with acute necrotizing pancreatitis (ANP). Therefore, the prevention of pancreatic infection is of great clinical value for the treatment of ANP. This study was designed to evaluate the efficacy and safety of Thymosin Alpha 1 among patients with ANP.

**Methods/Design:** This is a prospective, randomized, multicenter, double-blind, placebo-controlled study. 520 eligible ANP patients will be randomized in a 1:1 ratio to receive either the Thymosin alpha 1 or the placebo using the same mode of administration. The primary endpoint is the incidence of IPN during the index admission. Most of the secondary endpoints will be registered through the index admission including in-hospital mortality, incidence of new-onset organ failure and new-onset persistent organ failure (respiration, cardiovascular and renal), receipt of new organ support therapy, requirement for drainage or necrosectomy, bleeding requiring intervention, HLA-DR on day0, day7 and day14, etc. and adverse events. Considering the possibility of readmission, an additional follow-up will be arranged 90 days after enrollment, and IPN and death at Day90 will also be served as secondary outcomes.

**Ethics and dissemination:** This study was approved by the ethics committee of Jinling Hospital, Nanjing University (No. 2015NZKY-004-02). The TRACE trial was designed to test the effect of a new therapy focusing on the immune system in preventing secondary infection following ANP. The results of this trial will be disseminated in peer-reviewed journals and at scientific conferences.

**Trial registration:** The trial has been registered at the ClinicalTrials.gov registry (NCT02473406)

### Strengths and limitations of this study

Strength 1: This is a randomized, multicenter, double-blind, placebo-controlled trial providing top-class evidence concerning the efficacy and safety of thymosin alpha 1 for patients with ANP.

Strength 2: Based on the favorable safety profile of thymosin alpha 1, no serious

1  
2  
3  
4 drug-related adverse event was expected and the data will be handled by an  
5  
6 independent data safety monitoring board (DSMB).

7  
8 Limitation 1: As infection is a relatively low-incidence complication of ANP, a  
9  
10 sample size of 520 will be required to detect the efficacy of Thymosin Alpha 1, which  
11  
12 will take years before the final conclusion could be drawn.

13  
14 Limitation 2: Due to the limited resources we could utilize, continuous immune  
15  
16 function assessment is impossible in this study. Alternatively, we opted to appraise  
17  
18 the immune status with predesigned time points.  
19  
20  
21  
22  
23  
24  
25  
26  
27  
28  
29  
30  
31  
32  
33  
34  
35  
36  
37  
38  
39  
40  
41  
42  
43  
44  
45  
46  
47  
48  
49  
50  
51  
52  
53  
54  
55  
56  
57  
58  
59  
60



## ***Background***

Infected pancreatic necrosis (IPN) and its related septic complications contribute substantially to deaths in patients with acute necrotizing pancreatitis (ANP)[1]. Compared with patients with sterile necrosis, those with IPN suffered a significant increase in mortality ranging from 14% to 69%, despite advances in critical care, surgical and endoscopic interventions and antibiotics[2]. Therefore, the prevention of pancreatic necrosis infection is of great clinical value in the treatment of ANP. Over the past years, numerous attempts had been made to prevent or delay the development of IPN including antibiotic prophylaxis, early enteral nutritional, selective gut decontamination and probiotics, but none of them had been proved to improve patient-centered outcomes with high-quality evidence [3-6]. More efficacious treatment aiming at reducing infectious complications of ANP is in need.

Immunosuppression and disorders characterized by decreased HLA-DR expression and unbalanced CD3/CD4+/CD8+ T cells of peripheral blood mononuclear cell (PBMC) are reported to be associated with IPN[7, 8], especially in those with a more severe type of disease, whose suppressed immune function occurs early and strongly[8, 9]. Our previous observational study found that early enteral nutrition could moderate the excessive immune response during the early stage of severe acute pancreatitis without leading to subsequent immunosuppression, and ultimately reduce the incidence of infection and ICU stay [10]. Thus, immunomodulatory treatment could potentially intervene in the evolution of secondary infection of pancreatic necrosis, resulting in better outcomes. Efforts had been made in this field using drugs like lexipafant and octreotide, but the hitherto existing evidence failed to show solid clinical benefits of immunomodulation with regard to major clinical outcomes [11].

Thymosin alpha 1 had been shown to have immunomodulatory properties and was reported to be clinically beneficial in patients with sepsis[12, 13], majorly through the involvement of distinct Toll-like receptors (TLRs) acting on different dendritic cells (DC) subsets and involving the MyD88-dependent signaling pathway. However, for acute pancreatitis, the only randomized controlled study was the pilot one conducted by our group years ago, suggesting that the use of Thymosin alpha 1 was associated

1  
2  
3  
4 with improved cellular immunity and reduced infection rate in a group of 24  
5 patients[14]. Due to the nature of the small sample size and single-center, the clinical  
6 implication and generalizability of this study are thought to be limited. Therefore,  
7 thymosin alpha 1 in the prevention of pancreatic infection following acute necrotizing  
8 pancreatitis (TRACE trial) was designed with sufficient power performed in 16  
9 hospitals in China  
10  
11  
12  
13  
14

### 15 16 ***Study objectives***

17  
18 The primary objective of the TRACE trial is to determine whether Thymosin Alpha  
19 1 is superior to placebo in reducing the incidence of infected pancreatic necrosis in  
20 patients with acute necrotic pancreatitis. Secondary objectives are to determine the  
21 safety and the impact on immune function from Thymosin Alpha 1 among patients with  
22 ANP.  
23  
24  
25  
26  
27  
28

### 29 30 ***Study Design***

31 The present study (the TRACE trial) is an investigator-initiated, multicenter,  
32 individually-randomized, double-blind, placebo-controlled, parallel-group study. This  
33 trial was registered on June 16, 2015, in the CT.gov registry (NCT02473406,  
34 <https://www.clinicaltrials.gov/>) and was approved by the ethics committee of Jinling  
35 Hospital, Nanjing University (No. 2015NZKY-004-02). Local ethics approval was also  
36 obtained before enrollment in each participating center. The TRACE trial was designed  
37 and coordinated by the Center of Severe Acute Pancreatitis at Nanjing University and  
38 the coordinating and data management center of the Chinese Acute Pancreatitis Clinical  
39 Trials Group (CAPCTG). The trial steering committee (TSC) was formed to oversee  
40 the implementation of the study, and a data safety monitoring board (DSMB) will  
41 regularly (every 6 months) review the safety report prepared by the trial statistician  
42 from the accumulating data of this trial.  
43  
44  
45  
46  
47  
48  
49  
50  
51  
52  
53

### 54 55 56 ***Study population***

57  
58 This clinical trial is performed in 16 hospitals from China. All adult patients with  
59 AP admitted to the participating centers will be assessed for eligibility after  
60

admission. The inclusion and exclusion criteria are as follows:

*Inclusion criteria*

1. Symptoms and signs of acute pancreatitis based on abdominal pain suggestive of AP, serum amylase at least three times the upper limit of normal, and/or characteristic findings of AP on computed tomography or less commonly magnetic resonance imaging (MRI) or transabdominal ultrasonography according to the Revised Atlanta Criteria[15];
2. Less than one week from the onset of abdominal pain;
3. Age between 18 to 70 years old;
4. Acute Physiology and Chronic Health Evaluation (APACHE II) score  $\geq 8$  during the last 24 hours before enrollment
5. Balthazar CT score  $\geq 5$  (presence of pancreatic necrosis)[16].
6. Written informed consent obtained

*Exclusion criteria*

1. Pregnant pancreatitis;
2. History of chronic pancreatitis;
3. Malignancy related acute pancreatitis
4. Receiving early intervention or surgery due to abdominal compartment syndrome or other reasons before admission;
5. Patients with a known history of severe cardiovascular, respiratory, renal or hepatic diseases defined as (1) greater than New York Heart Association Class II heart failure (Class II not included), (2) active myocardial ischemia or (3) cardiovascular intervention within previous 60 days, (4) history of cirrhosis or (5) chronic kidney disease with creatinine clearance  $< 40$  mL/min, or (6) chronic obstructive pulmonary disease with requirement for home oxygen;
6. Patients with preexisting immune disorders such as AIDS.

A patient will be considered eligible if he/she meets the inclusion criteria and does not meet any of the exclusion criteria. Allocation will be performed after signed consent is obtained. The study protocol flow of participants is outlined in Figure 1.

### ***Randomization and blinding methods***

After the completion of screening measurements and the acquisition of written informed consent, eligible participants will be randomized in a 1:1 ratio to either the treatment group or the placebo group. The randomization code was computer-generated with a block size of 4.

Participants, clinical investigators, and investigators assessing outcome data will be blinded to the treatment allocation to minimize potential sources of bias. The trial statistician will also be blinded regarding the treatment code when developing the statistical programs, which will be validated and completed using dummy randomization codes. The actual allocation will only be provided to the study team after locking of the database and approval of the statistical analysis plan.

### ***Trial drugs***

After randomization, the participant will receive:

1. Thymosin Alpha 1 1.6mg I.H q12h for the first 7 days and 1.6mg I.H, qd for the following 7 days. The administration will be terminated any day during the treatment when the patient deemed as qualified for discharge, or
2. Matching placebo(normal saline) using the same mode of administration as the above mentioned.

As shown in Figure 1, the recruited patients will start randomized drugs subcutaneously from the day after the allocation day. Thymosin Alpha will be provided by SciClone Pharmaceuticals and the matching placebo by Chengdu Tongde Pharmaceuticals. All study drugs will be stored in a secure area with access limited to the investigators and authorized study site personnel, and under appropriate storage conditions.

### ***General treatment regimen***

All patients will receive initial standard treatment including fluid therapy, early enteral nutrition, routine medical treatment like proton pump inhibitor as indicated, mechanical ventilation if needed, and continuous renal replacement therapy (CRRT) if

needed in the light of recently published guidelines[17]. All participating centers are able to offer appropriate intensive care in case the patients require organ support or continuous monitoring. The necrotic collection will be intervened when infection is suspected or confirmed, but the intervention should be optimally delayed for 4 weeks when the patient could tolerate the symptoms as suggested by the guidelines[17].

When pancreatic infection occurs, either a surgical or endoscopic step-up approach considering the location of the necrotic collection and the technical availability in each participating center will be applied. Initial drainage is optimally performed after the necrotic collection is well walled-off based on guideline recommendations[17]. Principally, either percutaneous catheter drainage or endoscopic transluminal placement of double pig-tail stents, rather than debridement, are the primary choices of treatment.

### ***Endpoints***

#### *Primary outcome measure*

The incidence of IPN during the index admission will be served as the primary outcome measure of the TRACE trial. The diagnosis of IPN will be based on the international guidelines when one or more of the following were present: gas bubbles within (peri) pancreatic necrosis on computed tomography; a positive culture of (peri) pancreatic necrosis obtained by image-guided fine-needle aspiration; a positive culture of (peri) pancreatic necrosis obtained during the first drainage and/or necrosectomy[15].

#### *Secondary outcome measures*

##### *Part I: Secondary outcomes during the index admission*

1. The occurrence of new-onset organ failure and new-onset persistent organ failure (SOFA score for respiration, cardiovascular, or renal system  $\geq 2$  ). New-onset is defined as events that occur after randomization and not present 24 hours before randomization;
2. In-hospital mortality;
3. Bleeding requiring intervention;
4. Gastrointestinal perforation or fistula requiring intervention;

5. Incidence of pancreatic fistula
6. New receipt of mechanical ventilation (not applied 24 hours before randomization);
7. New receipt of renal replacement therapy (not applied 24 hours before randomization);
8. New receipt of vasoactive agents (not applied 24 hours before randomization);
9. The requirement for catheter drainage (either percutaneous or endoscopic)
10. Number of drainage procedures required;
11. The requirement for minimally-invasive debridement;
12. Number of minimally invasive necrosectomy required;
13. The requirement for open surgery;
14. Number of open surgery required;
15. Length of intensive care unit(ICU) stay;
16. Length of hospital stay;
17. SOFA score on day0, day7, and day14;
18. CRP level on day0, day7, and day14;
19. HLA-DR level on day0, day7, and day14;
20. Lymphocyte count on day0, day7 and day 14;
21. In-hospital cost.

*Part II: Secondary outcomes within 90 days after enrollment*

1. Incidence of infection within 90 days after enrollment;
2. Mortality within 90 days after enrollment;

***Sample size estimation***

The incidence of pancreatic infection during the index admission was reported to be around 25% in ANP episodes combined with an APACHE II score  $\geq 8$  in our previous studies[18, 19]. To demonstrate a 40% reduction in the incidence of pancreatic infection on the basis of our pilot study [14], we projected a sample size of 500 participants with 80% power at a two-sided alpha level of 0.05 using the PASS software (PASS 11, NCSS software, Kaysville, USA). In our study , we planned to randomize 520 patients

1  
2  
3  
4 after considering 4% of lost follow up.  
5  
6

### 7 ***Statistical analysis***

9 Primary analyses will be based on the intention-to-treat (ITT) population, and  
10 secondary supportive analyses will be done on the PP population. The safety analysis  
11 will be performed on the safety population. Missing data will be handled by multiple  
12 imputations to evaluate the robustness of the primary endpoint analyses[20].The  
13 populations are defined as follows:  
14  
15  
16  
17  
18

- 19 1. ITT population: This population consists of all randomized subjects, regardless of  
20 whether they are ineligible, prematurely discontinue treatment, or are otherwise  
21 protocol violators/deviators.  
22
- 23 2. Per-protocol (PP) population: This population is a subset of the ITT population.  
24 Subjects with major protocol deviations will be excluded from the PP population.  
25 Major protocol deviations will be defined in the statistical analysis plan.  
26
- 27 3. Safety population: This population will be the same as the ITT population, which  
28 consists of all randomized subjects, who receive at least one dose of study drug.  
29  
30  
31  
32  
33  
34

35 The normality of continuous variables was examined using skewness and kurtosis.  
36  
37 Categorical data were expressed as number and percentage. A generalized linear  
38 model (GLM) will be employed to compare group differences. No interim unblinding  
39 and analysis. Statistical tests will be two-sided, and p values < 0.05 will be accepted as  
40 significant. A full definition and explanation of all primary, secondary and pre-defined  
41 subgroup analyses such as patients with different severity of AP(severe and non-  
42 severe), patients with different age(dichotomized at 60 years old), patients with  
43 different etiologies (biliary and non-biliary) and patients with different extent of  
44 pancreatic necrosis(>50% and ≤50%) will be included in the statistical analysis plan.  
45  
46  
47  
48  
49  
50  
51  
52  
53

### 54 ***Adverse events***

55  
56 Adverse events (AEs) are defined in accordance with the National Cancer Institute-  
57 Common Terminology Criteria for Adverse Events as any untoward medical  
58 occurrence in a patient, or clinical investigation subject administered an investigational  
59  
60

1  
2  
3  
4 intervention and which does not necessarily have to have a causal relationship with this  
5  
6 treatment.

7  
8 It is recognized that the patient population (ANP with relatively high APACHE II  
9  
10 score) will experience a number of common aberrations in laboratory values, signs and  
11  
12 symptoms due to the severity of the underlying disease and the impact of standard  
13  
14 therapies. These will not necessarily constitute an adverse event unless they require  
15  
16 significant intervention or are considered to be of concern in the investigator's clinical  
17  
18 judgment. The DSMB will review the safety report every 6 months.

### 21 ***Recruiting process***

22  
23 The trial was registered on June 16, 2015, in the CT.gov registry(NCT02473406  
24  
25 <https://www.clinicaltrials.gov>). The first patient was randomized on the 22nd of  
26  
27 March 2017. So far, 426 patients had been randomized and the enrollment keeps to  
28  
29 the schedule.

### 30 ***Patient and Public Involvement***

31  
32 Patients or the public were not involved in the design, or conduct, or reporting, or  
33  
34 dissemination plans of our research.

### 35 ***Data collection and management***

36  
37 A web-based electrical database (access through the website of the CAPCTG,  
38  
39 <https://capctg.medbit.cn/>) will be used for data collection and storage. All data will be  
40  
41 input by the primary investigator or nominated investigator (less than two for each  
42  
43 participating center) approved by the primary investigator, and a double check will be  
44  
45 done by the research coordinator. Training for data entry will be performed by the  
46  
47 provider of the electrical database and the coordinating and data management center of  
48  
49 the CAPCTG. According to the schedule shown in Figure 2, the investigator will collect  
50  
51 data during the index admission and at day 90 after enrollment.

### 52 53 54 55 **Discussion**

56  
57 The TRACE trial was designed to test the effect of a new therapy focusing on the  
58  
59 immune system in preventing secondary infection following ANP, which is a  
60



1  
2  
3  
4 potentially lethal complication causing substantial morbidity and mortality. We also  
5 aimed to prospectively investigate the effect of immunomodulatory treatment with  
6 thymosin alpha 1 in patients with different severity of diseases with predefined  
7 subgroup analysis. The results of the TRACE trial would potentially provide a novel  
8 therapeutic option in the early management of ANP and identify the patient population  
9 who may benefit most from immunomodulation.  
10  
11  
12  
13  
14

15 Immunomodulation is of significant clinical value in critically ill settings and the  
16 treatment of sepsis[12]. While, acute pancreatitis, which has a lot in common with  
17 sepsis like overwhelmed inflammation and infection related complications, might be  
18 another good target for immunomodulatory therapy. In general, previously studied  
19 drugs such as lexipafant and octreotide were aimed to control cytokines, which are  
20 thought to be the pivotal part in the early inflammatory response of AP, rather than  
21 preventing secondary infection[11]. However, like what we learned in sepsis,  
22 immunosuppression quickly following the initial inflammatory cascades should be the  
23 target of treatment during the course of ANP, as well, especially in those with organ  
24 failure[8, 21]. A pilot study published from our group several years ago indicated that  
25 the administration of thymosin  $\alpha 1$  could improve compromised monocyte HLA-DR  
26 expression and reduce infection rate in a small group of patients (n=24) with severe  
27 acute pancreatitis defined by the Atlanta Classification. The result of this study is  
28 encouraging which drive us to conduct this large multi-center RCT to obtain more  
29 reliable clinical evidences[14].  
30  
31  
32  
33  
34  
35  
36  
37  
38  
39  
40  
41  
42  
43  
44

45 The TRACE trial was sponsored by the CSAP at Jinling Hospital, Nanjing University,  
46 which is the national referral center for acute pancreatitis (AP) admitting more than 600  
47 cases of AP annually and coordinated by the CAPCTG coordinating and data  
48 management center, which could cover the whole country. The trial will be performed  
49 in 16 centers across China and aims to recruit 520 patients. Due to the limitation of the  
50 budget and technical availability, we can not perform comprehensive immune test in  
51 multiple time points, and alternatively, we choose monocyte HLA-DR, which is a  
52 representative parameter of the immune system majorly reflecting the antigen  
53 presentation capacity to assess the immunomodulatory effect of thymosin alpha 1 and  
54  
55  
56  
57  
58  
59  
60

1  
2  
3  
4 also be widely used in previous studies regarding immune function in different diseases  
5  
6 like sepsis[12, 22].

7  
8 In conclusion, the TRACE trial aims to assess the efficacy of thymosin  $\alpha$ 1  
9  
10 administered early during the disease course of ANP on the rate of necrosis infection  
11  
12 and other major clinical outcomes and thereby offer a novel therapeutic option in the  
13  
14 treatment of ANP patients.  
15  
16  
17  
18  
19  
20  
21  
22  
23  
24  
25  
26

27  
28  
29  
30  
31  
32  
33  
34  
35  
36  
37  
38  
39  
40  
41  
42  
43  
44  
45  
46  
47  
48  
49  
50  
51  
52  
53  
54  
55  
56  
57  
58  
59  
60

References:

1. Dellinger, E.P., et al., *Determinant-based classification of acute pancreatitis severity: an international multidisciplinary consultation*. Ann Surg, 2012. **256**(6): p. 875-80.
2. Tenner, S., et al., *American College of Gastroenterology guideline: management of acute pancreatitis*. Am J Gastroenterol, 2013. **108**(9): p. 1400-15; 1416.
3. Wittau, M., et al., *Systematic review and meta-analysis of antibiotic prophylaxis in severe acute pancreatitis*. Scand J Gastroenterol, 2011. **46**(3): p. 261-70.
4. Luiten, E.J., et al., *Controlled clinical trial of selective decontamination for the treatment of severe acute pancreatitis*. Ann Surg, 1995. **222**(1): p. 57-65.
5. Besselink, M.G., et al., *Probiotic prophylaxis in predicted severe acute pancreatitis: a randomised, double-blind, placebo-controlled trial*. Lancet, 2008. **371**(9613): p. 651-9.
6. Bakker, O.J., et al., *Early versus on-demand nasoenteric tube feeding in acute pancreatitis*. N Engl J Med, 2014. **371**(21): p. 1983-93.
7. Uehara, S., et al., *Immune function in patients with acute pancreatitis*. J Gastroenterol Hepatol, 2003. **18**(4): p. 363-70.
8. Yu, W.K., et al., *Mononuclear histocompatibility leukocyte antigen-DR expression in the early phase of acute pancreatitis*. Pancreatology, 2004. **4**(3-4): p. 233-43.
9. Minkov, G.A., Y.P. Yovtchev, and K.S. Halacheva, *Increased Circulating CD4+CD25+CD127low/neg Regulatory T-cells as a Prognostic Biomarker in Acute Pancreatitis*. Pancreas, 2017. **46**(8): p. 1003-1010.
10. Sun, J.K., et al., *Effects of early enteral nutrition on immune function of severe acute pancreatitis patients*. World J Gastroenterol, 2013. **19**(6): p. 917-22.
11. Yang, N., et al., *The effect of thymosin alpha1 for prevention of infection in patients with severe acute pancreatitis*. Expert Opin Biol Ther, 2018. **18**(sup1): p. 53-60.
12. Wu, J., et al., *The efficacy of thymosin alpha 1 for severe sepsis (ETASS): a multicenter, single-blind, randomized and controlled trial*. Crit Care, 2013. **17**(1): p. R8.

13. Martin-Loeches, I., et al., *The protective association of endogenous immunoglobulins against sepsis mortality is restricted to patients with moderate organ failure*. *Ann Intensive Care*, 2017. **7**(1): p. 44.
14. Wang, X., et al., *Thymosin alpha 1 is associated with improved cellular immunity and reduced infection rate in severe acute pancreatitis patients in a double-blind randomized control study*. *Inflammation*, 2011. **34**(3): p. 198-202.
15. Banks, P.A., et al., *Classification of acute pancreatitis--2012: revision of the Atlanta classification and definitions by international consensus*. *Gut*, 2013. **62**(1): p. 102-11.
16. Balthazar, E.J., *Acute pancreatitis: assessment of severity with clinical and CT evaluation*. *Radiology*, 2002. **223**(3): p. 603-13.
17. Working Group, I.A.P.A.P.A.A.P.G., *IAP/APA evidence-based guidelines for the management of acute pancreatitis*. *Pancreatology*, 2013. **13**(4 Suppl 2): p. e1-15.
18. Sun, J.K., et al., *A modified gastrointestinal failure score for patients with severe acute pancreatitis*. *Surg Today*, 2013. **43**(5): p. 506-13.
19. Ke, L., et al., *D-dimer as a marker of severity in patients with severe acute pancreatitis*. *J Hepatobiliary Pancreat Sci*, 2012. **19**(3): p. 259-265.
20. Zhang, Z., *Multiple imputation with multivariate imputation by chained equation (MICE) package*. *Ann Transl Med*, 2016. **4**(2): p. 30.
21. Kylanpaa-Back, M.L., et al., *Cellular markers of systemic inflammation and immune suppression in patients with organ failure due to severe acute pancreatitis*. *Scand J Gastroenterol*, 2001. **36**(10): p. 1100-7.
22. Zorio, V., et al., *Assessment of sepsis-induced immunosuppression at ICU discharge and 6 months after ICU discharge*. *Ann Intensive Care*, 2017. **7**(1): p. 80.

Figure 1: Trial flow chart.

Figure 2. Schedule for participants enrolment, drug administration, and data collection.

Declarations

### ***Declarations***

#### **Authors' contributions:**

Study concept and design: L K, Z T

Acquisition of data; analysis and interpretation of data: J Z, G L, B Y, Z Z, W M

Drafting of the manuscript; J Z, L K

Critical revision of the manuscript for important intellectual content: Z Z, W L

Obtained funding; administrative, technical, or material support: Z T, W L

Study supervision: W L, J L

#### **Competing interests**

This study was supported by SBE2016750187 of Science and technology project, Jiangsu Province, China. SciClone Pharmaceuticals in part provided the study drug for this investigator-initiated study, but had no influence on the study design, data analysis or report. The investigators take full responsibility of the integrity and content of this paper.

#### **Funding:**

This study was funded by SBE2016750187 of Science and technology project, Jiangsu Province, China, partly by SciClone Pharmaceuticals Holding Limited. The sponsor had no role in study design, data collection and interpretation, or in the decision to submit the manuscript for publication.

#### ***Ethics approval and consent to participate:***

This study was approved by the ethic committee of Jinling Hospital. The Ethical Approval Document ID is 2015NZKY-004-02. Even central ethical approval has been confirmed, we will not begin recruiting at other centers in the trial until local ethical approval has been obtained. Besides, the consents for this study were obtained from each patient or his next of kin.

#### ***Consent for publication***

Not Applicable.

1  
2  
3  
4  
5  
6  
7  
8  
9  
10  
11  
12  
13  
14  
15  
16  
17  
18  
19  
20  
21  
22  
23  
24  
25  
26  
27  
28  
29  
30  
31  
32  
33  
34  
35  
36  
37  
38  
39  
40  
41  
42  
43  
44  
45  
46  
47  
48  
49  
50  
51  
52  
53  
54  
55  
56  
57  
58  
59  
60

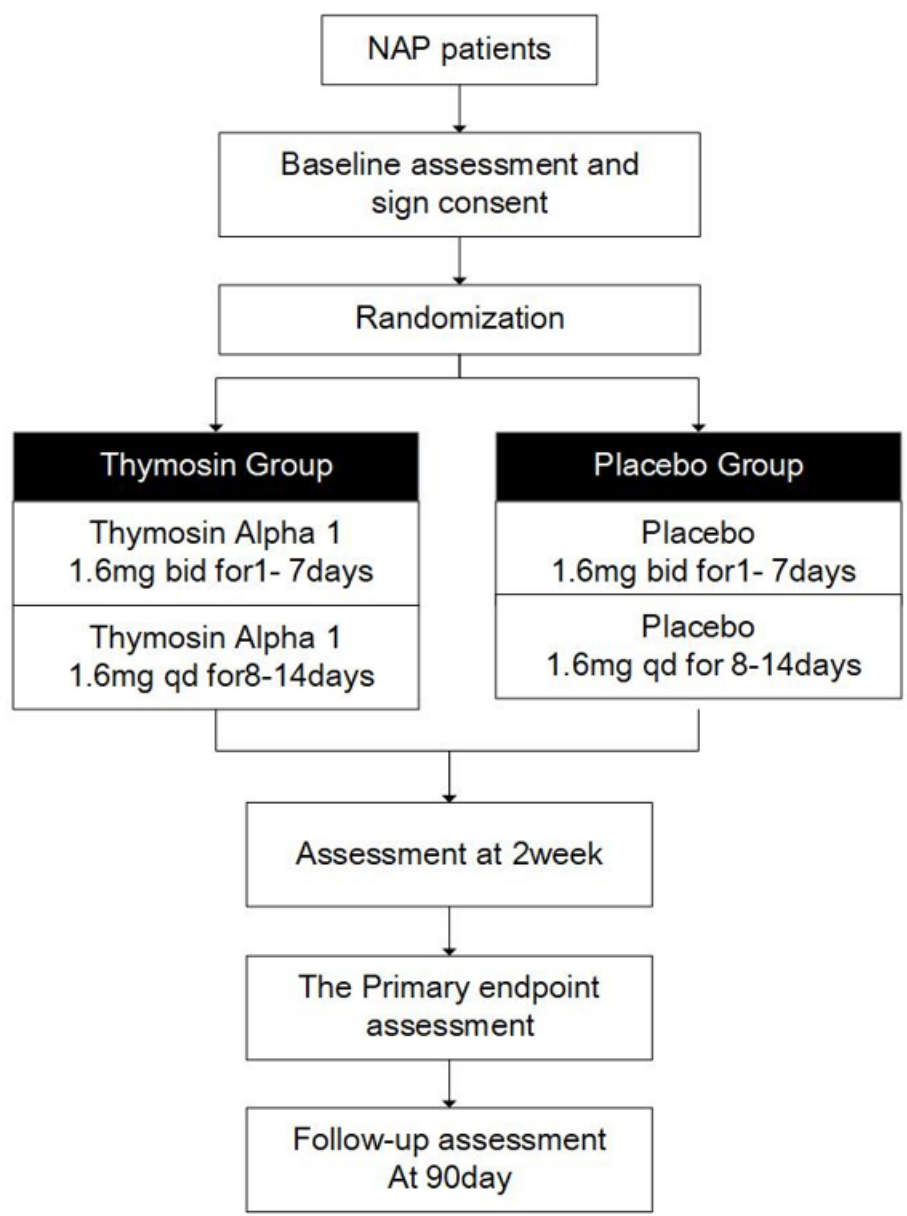

Figure 1 : Trial flow chart.

| TIMEPOINT                        | Study period |            |                 |      |         |       |                 |           |
|----------------------------------|--------------|------------|-----------------|------|---------|-------|-----------------|-----------|
|                                  | Enrollment   | Allocation | Index admission |      |         |       |                 | Follow-up |
|                                  | <24h         | 0          | day1-6          | day7 | day8-13 | day14 | discharge/death | 90 day    |
| <b>ENROLLMENT</b>                |              |            |                 |      |         |       |                 |           |
| Eligibility screening            | X            |            |                 |      |         |       |                 |           |
| Informed consent                 | X            |            |                 |      |         |       |                 |           |
| Allocation                       |              | X          |                 |      |         |       |                 |           |
| <b>INTERVENTIONS:</b>            |              |            |                 |      |         |       |                 |           |
| Drug Injection 1.6mg bid         |              |            | X               | X    |         |       |                 |           |
| Drug injection 1.6mg qd          |              |            |                 |      | X       | X     |                 |           |
| <b>ASSESSMENTS:</b>              |              |            |                 |      |         |       |                 |           |
| Incidence of IPN                 |              |            | ←—————→         |      |         |       |                 |           |
| Major complications              |              |            | ←—————→         |      |         |       |                 |           |
| Laboratory test                  | X            |            |                 | X    |         | X     |                 |           |
| Organ failure assessment         | X            |            |                 | X    |         | X     |                 |           |
| Status of vitality and infection |              |            |                 |      |         |       |                 | X         |

Figure 2. Schedule for participants enrolment, drug administration, and data collection.

# BMJ Open

## Thymosin alpha 1 in the prevention of infected pancreatic necrosis following acute necrotizing pancreatitis (TRACE trial): protocol of a multicenter, randomized, double-blind, placebo-controlled, parallel-group trial

|                               |                                                                                                                                                                                                                                                                                                                                                                                                                                                                                                                                                                                                                                                                                                                                                                                                                                                                                                                                                                                                                                                                                                                                                                                                                                                                                                                                                                                                                                                                                                                                                                                                                                                                                                                                                                                                                                                                                                                                                                                                                                                                                                                                           |
|-------------------------------|-------------------------------------------------------------------------------------------------------------------------------------------------------------------------------------------------------------------------------------------------------------------------------------------------------------------------------------------------------------------------------------------------------------------------------------------------------------------------------------------------------------------------------------------------------------------------------------------------------------------------------------------------------------------------------------------------------------------------------------------------------------------------------------------------------------------------------------------------------------------------------------------------------------------------------------------------------------------------------------------------------------------------------------------------------------------------------------------------------------------------------------------------------------------------------------------------------------------------------------------------------------------------------------------------------------------------------------------------------------------------------------------------------------------------------------------------------------------------------------------------------------------------------------------------------------------------------------------------------------------------------------------------------------------------------------------------------------------------------------------------------------------------------------------------------------------------------------------------------------------------------------------------------------------------------------------------------------------------------------------------------------------------------------------------------------------------------------------------------------------------------------------|
| Journal:                      | <i>BMJ Open</i>                                                                                                                                                                                                                                                                                                                                                                                                                                                                                                                                                                                                                                                                                                                                                                                                                                                                                                                                                                                                                                                                                                                                                                                                                                                                                                                                                                                                                                                                                                                                                                                                                                                                                                                                                                                                                                                                                                                                                                                                                                                                                                                           |
| Manuscript ID                 | bmjopen-2020-037231.R1                                                                                                                                                                                                                                                                                                                                                                                                                                                                                                                                                                                                                                                                                                                                                                                                                                                                                                                                                                                                                                                                                                                                                                                                                                                                                                                                                                                                                                                                                                                                                                                                                                                                                                                                                                                                                                                                                                                                                                                                                                                                                                                    |
| Article Type:                 | Protocol                                                                                                                                                                                                                                                                                                                                                                                                                                                                                                                                                                                                                                                                                                                                                                                                                                                                                                                                                                                                                                                                                                                                                                                                                                                                                                                                                                                                                                                                                                                                                                                                                                                                                                                                                                                                                                                                                                                                                                                                                                                                                                                                  |
| Date Submitted by the Author: | 26-Jul-2020                                                                                                                                                                                                                                                                                                                                                                                                                                                                                                                                                                                                                                                                                                                                                                                                                                                                                                                                                                                                                                                                                                                                                                                                                                                                                                                                                                                                                                                                                                                                                                                                                                                                                                                                                                                                                                                                                                                                                                                                                                                                                                                               |
| Complete List of Authors:     | <p>Zhou, Jing; Nanjing University Medical School, Department of General Surgery, Jinling Hospital<br/> Mao, Wenjian; Nanjing Medical University, Department of General Surgery, Jinling Hospital<br/> Ke, Lu; Nanjing University Medical School, Department of General Surgery, Jinling Hospital<br/> Chen, T; Liverpool School of Tropical Medicine, Tropical Clinical Trials Unit, Department of Clinical Sciences<br/> He, Wenhua; First Affiliated Hospital of Nanchang University, Department of Gastroenterology<br/> Pan, Xinting; The Affiliated Hospital of Qingdao University, Department of Emergency Intensive Care Unit<br/> Chen, Miao; Affiliated Hospital of Zunyi Medical College, Department of Intensive Care Unit<br/> He, Chengjian; University of South China, Department of Intensive Care Unit, the Affiliated Nanhua Hospital<br/> Gu, Weili; Nantong City No 1 People's Hospital and Second Affiliated Hospital of Nantong University, Department of Intensive care Unit<br/> Wu, Jingyi; Yijishan Hospital of Wannan Medical College, Department of Intensive Care Unit<br/> Song, Jingchun; 94th Hospital of PLA, Department of Intensive Care Unit<br/> Ni, Haibin; Jiangsu Provincial Hospital of Integrated Chinese and Western Medicine, Department of Emergency<br/> Tu, Jianfeng; Zhejiang Provincial People's Hospital, Department of Emergency Medicine<br/> Sun, Junli; Zhengzhou University, Department of Intensive Care Unit, Luoyang Center Hospital<br/> Zhang, Guoxiu; Henan University of Science and Technology Affiliated First Hospital, Department of Intensive Care Unit<br/> Chen, Weiwei; Yangzhou University Affiliated Northern Jiangsu People's Hospital, Department of Gastroenterology<br/> Xue, Bing; Shangqiu First People's Hospital, Department of Emergency Intensive Care Unit<br/> Zhao, Xiangyang; Qilu Hospital of Shandong University Qingdao, Department of Intensive Care Unit<br/> Shao, Min; First Affiliated Hospital of Anhui Medical University, Department of Intensive Care Unit<br/> Liu, Yuxiu; Nanjing University Medical School, Department of Medical</p> |

|                                    |                                                                                                                                                                                                                                          |
|------------------------------------|------------------------------------------------------------------------------------------------------------------------------------------------------------------------------------------------------------------------------------------|
|                                    | Statistics, Jinling Hospital<br>Tong, Zhihui; Nanjing University Medical School, Department of General<br>Surgery, Jinling Hospital<br>Li, Weiqin; Nanjing University Medical School, Department of General<br>Surgery, Jinling Hospital |
| <b>Primary Subject<br>Heading</b>: | Gastroenterology and hepatology                                                                                                                                                                                                          |
| Secondary Subject Heading:         | Intensive care                                                                                                                                                                                                                           |
| Keywords:                          | Pancreatic disease < GASTROENTEROLOGY, IMMUNOLOGY, INFECTIOUS<br>DISEASES                                                                                                                                                                |
|                                    |                                                                                                                                                                                                                                          |

SCHOLARONE™  
Manuscripts





I, the Submitting Author has the right to grant and does grant on behalf of all authors of the Work (as defined in the below author licence), an exclusive licence and/or a non-exclusive licence for contributions from authors who are: i) UK Crown employees; ii) where BMJ has agreed a CC-BY licence shall apply, and/or iii) in accordance with the terms applicable for US Federal Government officers or employees acting as part of their official duties; on a worldwide, perpetual, irrevocable, royalty-free basis to BMJ Publishing Group Ltd ("BMJ") its licensees and where the relevant Journal is co-owned by BMJ to the co-owners of the Journal, to publish the Work in this journal and any other BMJ products and to exploit all rights, as set out in our [licence](#).

The Submitting Author accepts and understands that any supply made under these terms is made by BMJ to the Submitting Author unless you are acting as an employee on behalf of your employer or a postgraduate student of an affiliated institution which is paying any applicable article publishing charge ("APC") for Open Access articles. Where the Submitting Author wishes to make the Work available on an Open Access basis (and intends to pay the relevant APC), the terms of reuse of such Open Access shall be governed by a Creative Commons licence – details of these licences and which [Creative Commons](#) licence will apply to this Work are set out in our licence referred to above.

Other than as permitted in any relevant BMJ Author's Self Archiving Policies, I confirm this Work has not been accepted for publication elsewhere, is not being considered for publication elsewhere and does not duplicate material already published. I confirm all authors consent to publication of this Work and authorise the granting of this licence.

1  
2  
3  
4 1 Thymosin alpha 1 in the prevention of infected pancreatic necrosis  
5  
6 2 following acute necrotizing pancreatitis (TRACE trial): protocol of a  
7  
8 3 multicenter, randomized, double-blind, placebo-controlled, parallel-group  
9  
10 4 trial  
11  
12

13  
14 5 Jing Zhou<sup>1, a</sup>, Wenjian Mao<sup>2, a</sup>, Lu Ke<sup>1\*</sup>, Tao Chen<sup>3</sup>, Wenhua He<sup>4</sup>, Xinting Pan<sup>5</sup>, Miao Chen<sup>6</sup>,  
15  
16 6 Chengjian He<sup>7</sup>, Weili Gu<sup>8</sup>, Jingyi Wu<sup>9</sup>, Jingchun Song<sup>10</sup>, Haibin Ni<sup>11</sup>, Jianfeng Tu<sup>12</sup>, Junli Sun<sup>13</sup>,  
17  
18 7 Guoxiu Zhang<sup>14</sup>, Weiwei Chen<sup>15</sup>, Bing Xue<sup>16</sup>, Xiangyang Zhao<sup>17</sup>, Min Shao<sup>18</sup>, Yuxiu Liu<sup>19</sup>, Zhihui  
19  
20 8 Tong<sup>1\*</sup>, Weiqin Li<sup>1</sup>, for the Chinese Acute Pancreatitis Clinical Trials Group(CAPCTG)

21  
22 9 1 Department of General Surgery, Jinling Hospital, Nanjing University Medical School, Nanjing  
23  
24 10 210002, Jiangsu Province, China

25  
26 11 2 Department of General Surgery, Jinling Hospital, Nanjing Medical University, Nanjing 210002,  
27  
28 12 Jiangsu Province, China

29  
30 13 3 Tropical Clinical Trials Unit, Department of Clinical Sciences, Liverpool School of Tropical Medicine.  
31  
32 14 Liverpool, L3 5QA, UK

33  
34 15 4 Department of Gastroenterology, First Affiliated Hospital of Nanchang University, Nanchang  
35  
36 16 330006, Jiangxi Province, China.

37  
38 17 5 Department of Emergency Intensive Care Unit, The Affiliated Hospital of Qingdao University,  
39  
40 18 Qingdao, 266000, Shandong Province, China

41  
42 19 6 Department of Intensive Care Unit, Affiliated Hospital of Zunyi Medical College, Zunyi 63000,  
43  
44 20 Guizhou Province, China.

45  
46 21 7 Department of Intensive Care Unit of the Affiliated Nanhua Hospital, University of South China,  
47  
48 22 Hengyang 421001, Hunan Province, China.

49  
50 23 8 Department of Intensive care Unit of Nantong City No 1 People's Hospital and Second Affiliated  
51  
52 24 Hospital of Nantong, Nantong 226001, Jiangsu Province, China

53  
54 25 9 Department of Intensive Care Unit of the Yijishan Hospital of Wannan Medical College, Wuhu  
55  
56 26 241000, Anhui Province, China.

57  
58 27 10 Department of Intensive Care Unit, 94th Hospital of PLA, Nanchang 330006, Jiangxi Province,  
59  
60 28 China

- 1  
2  
3  
4 29 11 Department of Emergency, Jiangsu Provincial Hospital of Integrated Chinese and Western  
5  
6 30 Medicine, Nanjing 210010, Jiangsu Province, China  
7  
8 31 12Department of Emergency Medicine, Zhejiang Provincial People's Hospital, Hangzhou 310014,  
9  
10 32 Zhejiang Province, China  
11  
12 33 13 Department of Intensive Care Unit, Luoyang Central Hospital, Zhengzhou University, Luoyan  
13  
14 34 471100, Henan Province, China  
15  
16 35 14 Department of Intensive Care Unit, Henan University of Science and Technology Affiliated First  
17  
18 36 Hospital, Luoyan 471100, Henan Province, China  
19  
20 37 15 Department of Gastroenterology, Yangzhou University Affiliated Northern Jiangsu People's  
21  
22 38 Hospital, Yangzhou 225009, Jiangsu Province, China  
23  
24 39 16 Department of Emergency Intensive Care Unit, Shangqiu First People's Hospital, Shangqiu  
25  
26 40 476100, Henan Province, China  
27  
28 41 17 Department of Intensive Care Unit, Qilu Hospital of Shandong University, Qingdao 266000,  
29  
30 42 Shandong Province, China  
31  
32 43 18 Department of Intensive Care Unit, The First Affiliated Hospital of Anhui Medical University,  
33  
34 44 Hefei 230022, Anhui Province, China  
35  
36 45 19 Department of Medical Statistics, Jinling Hospital, Nanjing University Medical School, Nanjing  
37  
38 46 210002, Jiangsu Province, China  
39  
40 47 \*Correspondence to: Lu Ke & Zhihui Tong, Department of General Surgery, Jinling Hospital,  
41  
42 48 Nanjing University Medical School, Nanjing 210002, Jiangsu Province, China  
43  
44 49 Telephone: +8613182810702 Fax: +86-25-84803956  
45  
46 50 E-mail: kkb9832@gmail.com  
47  
48 51 a These authors contributed equally to this work  
49  
50  
51  
52  
53  
54  
55  
56  
57  
58  
59  
60

1  
2  
3  
4 53 **Abstract**

54 **Introduction:** Infected pancreatic necrosis (IPN) and its related septic complications  
55 are the major causes of death in patients with acute necrotizing pancreatitis (ANP).  
56 Therefore, the prevention of IPN is of great clinical value, and immunomodulatory  
57 therapy with Thymosin Alpha 1 may be beneficial. This study was designed to test the  
58 hypothesis that the administration of Thymosin Alpha 1 during the acute phase of ANP  
59 will result in a reduced incidence of IPN.

60 **Methods and analysis:** This is a randomized, multicenter, double-blind, placebo-  
61 controlled study. 520 eligible ANP patients will be randomized in a 1:1 ratio to receive  
62 either the Thymosin alpha 1 or the placebo using the same mode of administration. The  
63 primary endpoint is the incidence of IPN during the index admission. Most of the  
64 secondary endpoints will be registered within the index admission including in-hospital  
65 mortality, the incidence of new-onset organ failure and new-onset persistent organ  
66 failure (respiration, cardiovascular and renal), receipt of new organ support therapy,  
67 requirement for drainage or necrosectomy, bleeding requiring intervention, HLA-DR  
68 on day0, day7, and day14, etc., and adverse events. Considering the possibility of  
69 readmission, an additional follow-up will be arranged 90 days after enrollment, and  
70 IPN and death at Day90 will also be served as secondary outcomes.

71 **Ethics and dissemination:** This study was approved by the ethics committee of Jinling  
72 Hospital, Nanjing University (No. 2015NZKY-004-02). The TRACE trial was  
73 designed to test the effect of a new therapy focusing on the immune system in  
74 preventing secondary infection following ANP. The results of this trial will be  
75 disseminated in peer-reviewed journals and at scientific conferences.

76 **Trial registration :** The trial has been registered at the ClinicalTrials.gov registry  
77 (NCT02473406)

78 **Strengths and limitations of this study**

79 Strength 1: This is a randomized, multicenter, double-blind, placebo-controlled trial  
80 providing top-class evidence concerning the efficacy and safety of thymosin alpha 1 for  
81 patients with acute necrotizing pancreatitis.

82 Strength 2: The data will be handled by an independent data safety monitoring board

1  
2  
3  
4 83 (DSMB) to ensure the safety of the participants.

5  
6 84 Strength 3: Thymosin alpha 1 is a well-studied drug with a favorable safety profile in  
7  
8 85 previous trials.

9  
10 86 Limitation 1: A sample size of 520 is required to detect the efficacy of Thymosin Alpha  
11  
12 87 1 in preventing infected pancreatic necrosis, which will take years before the conclusion  
13  
14 88 could be drawn.

15  
16 89 Limitation 2: Continuous immune function assessment is not applied in this study.

17  
18 90

19  
20  
21  
22  
23  
24  
25  
26  
27  
28  
29  
30  
31  
32  
33  
34  
35  
36  
37  
38  
39  
40  
41  
42  
43  
44  
45  
46  
47  
48  
49  
50  
51  
52  
53  
54  
55  
56  
57  
58  
59  
60

For peer review only

1  
2  
3 91 **Background**  
4

5 92 Infected pancreatic necrosis (IPN) and its related septic complications contribute  
6  
7 93 substantially to deaths in patients with acute necrotizing pancreatitis(ANP)[1].  
8  
9 94 Compared with patients with sterile necrosis, those with IPN suffered a significant  
10  
11 95 increase in mortality ranging from 14% to 69%, despite advances in critical care,  
12  
13 96 surgical and endoscopic interventions, and antibiotics[2]. Therefore, the prevention of  
14  
15 97 IPN is of great clinical value in the treatment of ANP. Over the past years, numerous  
16  
17 98 attempts had been made to prevent or delay the development of IPN, including  
18  
19 99 antibiotic prophylaxis, early enteral nutritional, selective gut decontamination, and  
20  
21 100 probiotics. Still, none of them had been proved to improve patient-centered outcomes  
22  
23 101 with high-quality evidence [3-6]. More promising treatment aiming at reducing  
24  
25 102 infectious complications of ANP is in need.

26 103 Immunosuppression and disorders characterized by decreased HLA-DR expression  
27  
28 104 and unbalanced CD3/CD4+/CD8+ T cells of peripheral blood mononuclear cell are  
29  
30 105 reported to be associated with IPN[7, 8], especially in those with a more severe type of  
31  
32 106 disease, whose suppressed immune function occurs early and strongly[8, 9]. Our  
33  
34 107 previous observational study found that early enteral nutrition could moderate the  
35  
36 108 excessive immune response during the acute phase of severe acute pancreatitis without  
37  
38 109 leading to subsequent immunosuppression, and ultimately reduce the incidence of  
39  
40 110 infection and ICU stay [10]. Thus, immunomodulatory treatment could potentially  
41  
42 111 intervene in the development of IPN, resulting in better outcomes. Efforts had been  
43  
44 112 made in this field using drugs like lexipafant and octreotide. Still, the hitherto existing  
45  
46 113 evidence failed to show robust clinical benefits of immunomodulation with regard to  
47  
48 114 key clinical outcomes [11].

49 115 Thymosin alpha 1 had been shown to have immunomodulatory properties and was  
50  
51 116 reported to be clinically beneficial in patients with sepsis[12, 13], majorly through the  
52  
53 117 involvement of distinct Toll-like receptors acting on different dendritic cells subsets  
54  
55 118 and involving the MyD88-dependent signaling pathway. However, for acute  
56  
57 119 pancreatitis (AP), the only randomized controlled study was the pilot one conducted by  
58  
59 120 our group years ago, suggesting that the use of Thymosin alpha 1 was associated with

1  
2  
3  
4 121 improved cellular immunity and reduced infection rate in a group of 24 patients[14].  
5  
6 122 Due to the single-center set and small sample size, the clinical implication and  
7  
8 123 generalizability of this study are thought to be limited. Therefore, we designed this  
9  
10 124 multicenter trial, the Thymosin Alpha 1 in the Prevention of Infected Pancreatic  
11  
12 125 Necrosis Following Acute Necrotizing Pancreatitis (TRACE), with sufficient power to  
13  
14 126 test the hypothesis that the administration of Thymosin Alpha 1 during the acute phase  
15  
16 127 of ANP will result in a reduced incidence of IPN.  
17

### 18 128 19 129 ***Study objectives***

20 130 The primary objective of the TRACE trial is to determine whether Thymosin Alpha  
21  
22 131 1 is superior to placebo in reducing the incidence of IPN in patients with ANP.  
23  
24 132 Secondary objectives are to determine the safety and the impact on the immune function  
25  
26 133 of Thymosin Alpha 1 among patients with ANP.  
27

### 28 134 29 135 ***Study Design***

30  
31 136 The present study is an investigator-initiated, multicenter, individually-randomized,  
32  
33 137 double-blind, placebo-controlled, parallel-group study. This trial was registered on  
34  
35 138 June 16<sup>th</sup>, 2015, in the CT.gov registry (NCT02473406,  
36  
37 139 <https://www.clinicaltrials.gov/>) and was approved by the ethics committee of Jinling  
38  
39 140 Hospital, Nanjing University (No. 2015NZKY-004-02). Local ethics approval was also  
40  
41 141 obtained before enrollment in each participating center. The TRACE trial was designed  
42  
43 142 and coordinated by the Center of Severe Acute Pancreatitis at Nanjing University and  
44  
45 143 the coordinating and data management center of the Chinese Acute Pancreatitis Clinical  
46  
47 144 Trials Group (CAPCTG). The trial steering committee (TSC) was formed to oversee  
48  
49 145 the implementation of the study, and a data safety monitoring board (DSMB) will  
50  
51 146 regularly (every six months) review the safety report prepared by the trial statistician  
52  
53 147 from the accumulating data of this trial.  
54

### 55 148 56 149 ***Study population***

57  
58 150 This trial is performed in 16 hospitals from China. All adult patients with AP  
59  
60 151 admitted to the participating centers will be assessed for eligibility after admission. The

1  
2  
3  
4 152 inclusion and exclusion criteria are as follows:

5  
6 153 *Inclusion criteria*

- 7  
8 154 1. Symptoms and signs of AP based on abdominal pain suggestive of AP, serum  
9  
10 155 amylase at least three times the upper limit of normal, and/or characteristic findings of  
11  
12 156 AP on computed tomography or less commonly magnetic resonance imaging (MRI) or  
13  
14 157 transabdominal ultrasonography according to the Revised Atlanta Criteria[15];  
15  
16 158 2. Less than one week from the onset of abdominal pain;  
17  
18 159 3. Age between 18 to 70 years old;  
19  
20 160 4. Acute Physiology and Chronic Health Evaluation(APACHE II) score  $\geq$ eight during  
21  
22 161 the last 24 hours before enrollment  
23  
24 162 5. Balthazar CT score  $\geq$ 5 (presence of pancreatic necrosis)[16].  
25  
26 163 6. Written informed consent obtained

27 164 *Exclusion criteria*

- 28  
29 165 1. Pregnant pancreatitis;  
30  
31 166 2. History of chronic pancreatitis;  
32  
33 167 3. Malignancy related acute pancreatitis  
34  
35  
36 168 4. Receiving early intervention or surgery due to abdominal compartment syndrome  
37  
38 169 or other reasons before admission;  
39  
40 170 5. Patients with a known history of severe cardiovascular, respiratory, renal or hepatic  
41  
42 171 diseases defined as (1) greater than New York Heart Association Class II heart  
43  
44 172 failure(Class II not included), (2) active myocardial ischemia or (3) cardiovascular  
45  
46 173 intervention within previous 60 days, (4) history of cirrhosis or (5) chronic kidney  
47  
48 174 disease with creatinine clearance $<$  40 mL/min, or (6) chronic obstructive pulmonary  
49  
50 175 disease with the requirement for home oxygen;  
51  
52 176 6. Patients with preexisting immune disorders such as AIDS.

53  
54 177 A patient will be considered eligible if he/she meets the inclusion criteria and does  
55  
56 178 not meet any of the exclusion criteria. Allocation will be performed after signed consent  
57  
58 179 is obtained. The study protocol flow of participants is outlined in Figure 1.

59  
60 180



1  
2  
3 181 ***Randomization and blinding methods***  
4

5 182 After the completion of screening measurements and the acquisition of written  
6  
7 183 informed consent, eligible participants will be randomized in a 1:1 ratio to either the  
8  
9 184 treatment group or the placebo group. The randomization code was computer-generated  
10  
11 185 with a block size of 4, and the randomization was stratified by sites.

12  
13 186 Participants, clinical investigators, and investigators assessing outcome data will be  
14  
15 187 blinded to the treatment allocation to minimize potential sources of bias. The trial  
16  
17 188 statistician will also be blinded regarding the treatment code when developing the  
18  
19 189 statistical programs, which will be validated and completed using dummy  
20  
21 190 randomization codes. The actual allocation will only be provided to the study team after  
22  
23 191 locking of the database and approval of the statistical analysis plan.  
24

25 192

26 193 ***Trial drugs***

27  
28 194 After randomization, the participant will receive:

- 29  
30 195 1. Thymosin Alpha 1 1.6mg I.H q12h for the first seven days and 1.6mg I.H, qd  
31  
32 196 for the following seven days. The administration will be terminated any day  
33  
34 197 during the treatment when the patient is deemed as qualified for hospital  
35  
36 198 discharge, or dead.  
37  
38 199 2. Matching placebo(normal saline) using the same mode of administration as  
39  
40 200 the above mentioned.

41  
42 201 As shown in Figure 1, the recruited patients will start to receive randomized drugs  
43  
44 202 subcutaneously from the day after the allocation day. Thymosin Alpha will be provided  
45  
46 203 by SciClone Pharmaceuticals and the matching placebo by Chengdu Tongde  
47  
48 204 Pharmaceuticals. All study drugs will be stored in a secure area with access limited to  
49  
50 205 the investigators and authorized study site personnel, and under appropriate storage  
51  
52 206 conditions.  
53

54 207

55 208 ***General treatment regimen***

56  
57 209 All patients will receive standard treatment including fluid therapy, early enteral  
58  
59 210 nutrition, routine medical treatment like proton pump inhibitor as indicated, mechanical  
60

1  
2  
3  
4 211 ventilation if needed, and continuous renal replacement therapy (CRRT) if needed in  
5  
6 212 the light of recently published guidelines[17]. All participating centers are able to offer  
7  
8 213 appropriate intensive care in case the patients require organ support or continuous  
9  
10 214 monitoring. The necrotic collection will be intervened when infection is suspected or  
11  
12 215 confirmed, preferably after four weeks from the onset of the disease when the patient  
13  
14 216 could tolerate the symptoms as suggested by the guidelines[17].

15  
16 217 When pancreatic infection occurs, either a surgical or endoscopic step-up approach  
17  
18 218 considering the location of the necrotic collection and the technical availability in each  
19  
20 219 participating center will be applied. Principally, either percutaneous catheter drainage  
21  
22 220 or endoscopic transluminal placement of double pig-tail stents , rather than  
23  
24 221 debridement, are the primary choices of treatment.

25  
26 222

### 223 ***Endpoints***

#### 224 *Primary outcome measure*

25  
26  
27  
28  
29 225 The incidence of IPN during the index admission will be served as the primary  
30  
31 226 outcome measure of the TRACE trial. The diagnosis of IPN will be based on the  
32  
33 227 international guidelines when one or more of the following were present: gas bubbles  
34  
35 228 within (peri) pancreatic necrosis on computed tomography; a positive culture of (peri)  
36  
37 229 pancreatic necrosis obtained by image-guided fine-needle aspiration; a positive culture  
38  
39 230 of (peri) pancreatic necrosis obtained during the first drainage and/or necrosectomy[15].

#### 231 *Secondary outcome measures*

##### 232 *Part I: Secondary outcomes during the index admission*

- 233 1. The occurrence of new-onset organ failure and new-onset persistent organ failure  
234 (SOFA score for respiration, cardiovascular, or renal system  $\geq 2$  ). New-onset is  
235 defined as events that occur after randomization and not present 24 hours before  
236 randomization;
- 237 2. In-hospital mortality;
- 238 3. Bleeding requiring intervention;
- 239 4. Gastrointestinal perforation or fistula requiring intervention;
- 240 5. Incidence of pancreatic fistula

- 241 6. New receipt of mechanical ventilation (not applied 24 hours before
- 242 randomization);
- 243 7. New receipt of renal replacement therapy (not applied 24 hours before
- 244 randomization);
- 245 8. New receipt of vasoactive agents (not applied 24 hours before randomization);
- 246 9. The requirement for catheter drainage (either percutaneous or endoscopic)
- 247 10. Number of drainage procedures required;
- 248 11. The requirement for minimally-invasive debridement;
- 249 12. Number of minimally invasive necrosectomy required;
- 250 13. The requirement for open surgery;
- 251 14. Number of open operations required;
- 252 15. Length of intensive care unit(ICU) stay;
- 253 16. Length of hospital stay;
- 254 17. SOFA score on day0, day7, and day14;
- 255 18. CRP level on day0, day7, and day14;
- 256 19. HLA-DR level on day0, day7, and day14;
- 257 20. Lymphocyte count on day0, day7 and day 14;
- 258 21. In-hospital cost.

259 *Part II: Secondary outcomes within 90 days after enrollment*

- 260 1. Incidence of infection within 90 days after enrollment;
- 261 2. Mortality within 90 days after enrollment.

262  
263 ***Sample size estimation***

264 The incidence of IPN during the index admission was reported to be around 25% in  
265 ANP episodes combined with an APACHE II score $\geq$ 8 in our previous studies[18, 19].  
266 To reduce the incidence of IPN from 25% to 15% on the basis of our pilot study [14],  
267 we projected a sample size of 500 participants with 80% power at a two-sided alpha  
268 level of 0.05 using the PASS software (PASS 11, NCSS software, Kaysville, USA). In  
269 our study, we planned to randomize 520 patients after considering 4% of lost follow  
270 up.

271

**272 *Statistical analysis***

273 Primary analyses will be based on the intention-to-treat (ITT) population, and  
274 secondary supportive analyses will be done on the PP population. The safety analysis  
275 will be performed on the safety population. Missing data will be handled by multiple  
276 imputations to evaluate the robustness of the primary endpoint analyses[20]. The  
277 populations are defined as follows:

- 278 1. ITT population: This population consists of all randomized subjects, regardless of  
279 whether they are ineligible, prematurely discontinue treatment, or are otherwise  
280 protocol violators/deviators.
- 281 2. Per-protocol (PP) population: This population is a subset of the ITT population.  
282 Subjects with major protocol deviations will be excluded from the PP population.  
283 Major protocol deviations will be defined in the statistical analysis plan.
- 284 3. Safety population: This population will be the same as the ITT population, which  
285 consists of all randomized subjects, who receive at least one dose of study drug.

286 The normality of continuous variables was examined using skewness and kurtosis.  
287 Categorical data were expressed as number and percentage. A generalized linear  
288 model (GLM) will be employed to compare group differences in the primary outcome.  
289 No interim analysis was planned in our study. The detailed analysis strategies for  
290 secondary outcomes and subgroup analyses by the severity of AP(severe and non-  
291 severe), age(dichotomized at 60 years old), etiologies of AP (biliary and non-biliary)  
292 and extent of pancreatic necrosis(>50% and ≤50%), will be included in the statistical  
293 analysis plan. Statistical tests will be two-sided, and p values < 0.05 will be deemed as  
294 significant.

295

**296 *Adverse events***

297 Adverse events (AEs) are defined in accordance with the National Cancer Institute-  
298 Common Terminology Criteria for Adverse Events as any untoward medical  
299 occurrence in a patient, or clinical investigation subject administered an investigational  
300 intervention and which does not necessarily have to have a causal relationship with this

11

1  
2  
3  
4 301 treatment.

5 302 It is recognized that the study patient population (ANP with relatively high APACHE  
6 303 II score) will experience a number of common aberrations in laboratory values, signs,  
7 304 and symptoms due to the severity of the underlying disease and the impact of standard  
8 305 therapies. These will not necessarily constitute an adverse event unless they require  
9 306 significant intervention or are considered to be of concern in the investigator's clinical  
10 307 judgment. Thymosin alpha 1 is a well-studied drug with a favorable safety profile in  
11 308 previous trials [21]. The DSMB will review the safety report every six months.

12  
13  
14  
15  
16  
17  
18  
19  
20  
21 310 ***Recruiting process***

22 311 The trial was registered on June 16<sup>th</sup>, 2015, in the CT.gov registry(NCT02473406  
23 312 <https://www.clinicaltrials.gov>). The first patient was randomized on March 22<sup>nd</sup>,  
24 313 2017. So far, 426 patients had been randomized, and the enrollment keeps to the  
25 314 schedule.

26  
27  
28  
29  
30  
31  
32 316 ***Patient and Public Involvement***

33 317 Patients or the public were not involved in the design, or conduct, or reporting, or  
34 318 dissemination plans of our research.

35  
36  
37  
38  
39  
40 320 ***Data collection and management***

41 321 A web-based electrical database (access through the website of the CAPCTG,  
42 322 <https://capctg.medbit.cn/>) will be used for data collection and storage. All data will be  
43 323 input by the primary investigator or nominated investigators (less than two for each  
44 324 participating center) approved by the primary investigator, and a double check will be  
45 325 done by the research coordinator. Training for data entry will be performed by the  
46 326 provider of the electrical database (Unimed Scientific Inc., Wuxi, China) and the  
47 327 coordinating and data management center of the CAPCTG. According to the schedule  
48 328 shown in Figure 2, the investigator will collect data during the index admission and on  
49 329 day 90 after enrollment. If a study subject wishes to discontinue the study drug or the  
50 330 treating physician believes a study subject should discontinue the study drug due to

1  
2  
3  
4 331 medical considerations, the investigator will communicate with the study subject and  
5  
6 332 the treating physician to obtain the reasons. Further evaluation and follow-up will still  
7  
8 333 be performed unless the study subject withdraws consent for disclosure of information.  
9  
10 334 The study blinding will only be broken in a medical emergency when the treating  
11  
12 335 physician believes that the administration of the study drug is associated with the  
13  
14 336 emergency.

15 337

### 17 338 ***Ethics approval and dissemination***

19 339 This study was approved by the ethics committee of Jinling Hospital. The ethical  
20  
21 340 approval document ID is 2015NZKY-004-02. Even when central ethical approval has  
22  
23 341 been confirmed, we will not begin recruiting at other participating centers in the trial  
24  
25 342 until the local ethics committee approved the study. Site ethical approvals were  
26  
27 343 obtained from ethics committees of First Affiliated Hospital of Nanchang University,  
28  
29 344 The Affiliated Hospital of Qingdao University, Affiliated Hospital of Zunyi Medical  
30  
31 345 College, Nanhua Hospital, Second Affiliated Hospital of Nantong University, Yijishan  
32  
33 346 Hospital of Wannan Medical College, 908th Hospital of Chinese People's Liberation  
34  
35 347 Army, Jiangsu Province Hospital on Integration of Chinese and Western Medicine,  
36  
37 348 Zhejiang Provincial People's Hospital, Luoyang Central Hospital, The Affiliated  
38  
39 349 Hospital of Henan University of Science and Technology, Northern Jiangsu People's  
40  
41 350 Hospital, First People's Hospital of Shangqiu, Qilu Hospital of Shandong University,  
42  
43 351 and First Affiliated Hospital of Anhui Medical University. The results of this trial will  
44  
45 352 be reported in peer-reviewed journals and presented at scientific conferences.

46 353

### 48 354 ***Consent to participate***

50 355 The consents for this study is obtained from each patient or his/her next of kin with  
51  
52 356 full information regarding the possible adverse effects of the experimental drug and  
53  
54 357 potential consequences. The translated patient consent form is attached as a  
55  
56 358 supplemental file( Supplement Materials).

57 359

### 59 360 **Discussion**

1  
2  
3  
4 361 The TRACE trial was designed to test the efficacy of a new therapy targeting the  
5  
6 362 immune system in preventing IPN following ANP, which is a potentially lethal  
7  
8 363 complication causing substantial morbidity and mortality. We also aimed to investigate  
9  
10 364 the efficacy of immunomodulatory treatment with thymosin alpha 1 in patients with  
11  
12 365 different clinical characteristics using predefined subgroup analysis. The results of the  
13  
14 366 TRACE trial would potentially provide a novel therapeutic option in the management  
15  
16 367 of ANP and identify the patient population who may benefit most from the  
17  
18 368 administration of thymosin alpha 1.

19 369 Immunomodulation is of significant clinical value in critically ill settings and the  
20  
21 370 treatment of sepsis[12]. While, acute pancreatitis, which has a lot in common with  
22  
23 371 sepsis like overwhelmed inflammation and infection related complications, might be  
24  
25 372 another suitable target for immunomodulatory therapy. In general, previously studied  
26  
27 373 drugs such as lexipafant and octreotide were aimed to control cytokines, which are  
28  
29 374 thought to be the pivotal part in the early inflammatory response of AP, rather than  
30  
31 375 preventing the development of IPN[11]. However, like what we learned in sepsis,  
32  
33 376 immunosuppression quickly following the initial inflammatory cascades should be the  
34  
35 377 target of treatment during the course of ANP, as well, especially in those with organ  
36  
37 378 failure[8, 22]. A pilot study published by our group several years ago indicated that the  
38  
39 379 administration of thymosin alpha 1 could improve compromised monocyte HLA-DR  
40  
41 380 expression and reduce infection rate in a small group of patients (n=24) with severe  
42  
43 381 acute pancreatitis defined by the original Atlanta Classification. The result of this study  
44  
45 382 is encouraging which drive us to conduct this large multi-center RCT to obtain more  
46  
47 383 reliable clinical evidences[14].

48 384 The TRACE trial was sponsored by the CSAP at Jinling Hospital, Nanjing University,  
49  
50 385 which is the national referral center for acute pancreatitis (AP) admitting more than 600  
51  
52 386 cases of AP annually and coordinated by the CAPCTG coordinating and data  
53  
54 387 management center, which could cover the whole country. The trial is performed in 16  
55  
56 388 centers across China and aims to recruit 520 patients. Due to the limitation of the budget  
57  
58 389 and technical availability, we can not conduct a continuous immune assessment with  
59  
60 390 multiple markers and more time points. Alternatively, we choose monocyte HLA-DR,



391 which is a representative parameter of the immune system, majorly reflecting the  
392 antigen presentation capacity to assess the immunomodulatory effect of thymosin alpha  
393 1. HLA-DR was widely used in previous studies regarding immune function in different  
394 diseases like sepsis[12, 23].

395 In conclusion, the TRACE trial aims to assess the efficacy of thymosin  $\alpha$ 1  
396 administered early during the ANP on the incidence of IPN and other major clinical  
397 outcomes and thereby potentially offer a novel therapeutic option in the treatment of  
398 ANP patients.

#### 400 References:

- 401 1. Dellinger, E.P., et al., *Determinant-based classification of acute pancreatitis severity: an*  
402 *international multidisciplinary consultation*. Ann Surg, 2012. **256**(6): p. 875-80.
- 403 2. Tenner, S., et al., *American College of Gastroenterology guideline: management of acute*  
404 *pancreatitis*. Am J Gastroenterol, 2013. **108**(9): p. 1400-15; 1416.
- 405 3. Wittau, M., et al., *Systematic review and meta-analysis of antibiotic prophylaxis in severe acute*  
406 *pancreatitis*. Scand J Gastroenterol, 2011. **46**(3): p. 261-70.
- 407 4. Luiten, E.J., et al., *Controlled clinical trial of selective decontamination for the treatment of*  
408 *severe acute pancreatitis*. Ann Surg, 1995. **222**(1): p. 57-65.
- 409 5. Besselink, M.G., et al., *Probiotic prophylaxis in predicted severe acute pancreatitis: a*  
410 *randomised, double-blind, placebo-controlled trial*. Lancet, 2008. **371**(9613): p. 651-9.
- 411 6. Bakker, O.J., et al., *Early versus on-demand nasoenteric tube feeding in acute pancreatitis*. N  
412 Engl J Med, 2014. **371**(21): p. 1983-93.
- 413 7. Uehara, S., et al., *Immune function in patients with acute pancreatitis*. J Gastroenterol Hepatol,  
414 2003. **18**(4): p. 363-70.
- 415 8. Yu, W.K., et al., *Mononuclear histocompatibility leukocyte antigen-DR expression in the early*  
416 *phase of acute pancreatitis*. Pancreatology, 2004. **4**(3-4): p. 233-43.
- 417 9. Minkov, G.A., Y.P. Yovtchev, and K.S. Halacheva, *Increased Circulating*  
418 *CD4+CD25+CD127low/neg Regulatory T-cells as a Prognostic Biomarker in Acute Pancreatitis*.  
419 Pancreas, 2017. **46**(8): p. 1003-1010.
- 420 10. Sun, J.K., et al., *Effects of early enteral nutrition on immune function of severe acute*  
421 *pancreatitis patients*. World J Gastroenterol, 2013. **19**(6): p. 917-22.
- 422 11. Yang, N., et al., *The effect of thymosin alpha1 for prevention of infection in patients with severe*  
423 *acute pancreatitis*. Expert Opin Biol Ther, 2018. **18**(sup1): p. 53-60.
- 424 12. Wu, J., et al., *The efficacy of thymosin alpha 1 for severe sepsis (ETASS): a multicenter, single-*  
425 *blind, randomized and controlled trial*. Crit Care, 2013. **17**(1): p. R8.
- 426 13. Martin-Loeches, I., et al., *The protective association of endogenous immunoglobulins against*  
427 *sepsis mortality is restricted to patients with moderate organ failure*. Ann Intensive Care, 2017.  
428 **7**(1): p. 44.
- 429 14. Wang, X., et al., *Thymosin alpha 1 is associated with improved cellular immunity and reduced*



- 1  
2  
3 430 *infection rate in severe acute pancreatitis patients in a double-blind randomized control study.*  
4 431 *Inflammation*, 2011. **34**(3): p. 198-202.
- 5 432 15. Banks, P.A., et al., *Classification of acute pancreatitis--2012: revision of the Atlanta*  
6 433 *classification and definitions by international consensus.* *Gut*, 2013. **62**(1): p. 102-11.
- 7 434 16. Balthazar, E.J., *Acute pancreatitis: assessment of severity with clinical and CT evaluation.*  
8 435 *Radiology*, 2002. **223**(3): p. 603-13.
- 9 436 17. Working Group, I.A.P.A.P.A.A.P.G., *IAP/APA evidence-based guidelines for the management of*  
10 437 *acute pancreatitis.* *Pancreatology*, 2013. **13**(4 Suppl 2): p. e1-15.
- 11 438 18. Sun, J.K., et al., *A modified gastrointestinal failure score for patients with severe acute*  
12 439 *pancreatitis.* *Surg Today*, 2013. **43**(5): p. 506-13.
- 13 440 19. Ke, L., et al., *D-dimer as a marker of severity in patients with severe acute pancreatitis.* *J*  
14 441 *Hepatobiliary Pancreat Sci*, 2012. **19**(3): p. 259-265.
- 15 442 20. Zhang, Z., *Multiple imputation with multivariate imputation by chained equation (MICE)*  
16 443 *package.* *Ann Transl Med*, 2016. **4**(2): p. 30.
- 17 444 21. Schulof, R.S., *Thymic peptide hormones: basic properties and clinical applications in cancer.*  
18 445 *Crit Rev Oncol Hematol*, 1985. **3**(4): p. 309-76.
- 19 446 22. Kylanpaa-Back, M.L., et al., *Cellular markers of systemic inflammation and immune suppression*  
20 447 *in patients with organ failure due to severe acute pancreatitis.* *Scand J Gastroenterol*, 2001.  
21 448 **36**(10): p. 1100-7.
- 22 449 23. Zorio, V., et al., *Assessment of sepsis-induced immunosuppression at ICU discharge and 6*  
23 450 *months after ICU discharge.* *Ann Intensive Care*, 2017. **7**(1): p. 80.

31 451  
32  
33 452 Figure 1: Trial flow chart.

34 453  
35  
36 454 Figure 2. Schedule for participants enrolment, drug administration, and data collection.

467

468

469 ***Declarations***470 **Authors' contributions:**

471 All authors were involved in the study design, and read and approved the final manuscript. During  
472 the study, J Z, W M and Y L are responsible for randomizing the patients and ensuring the blinding.

473 J Z, W H, X P, M C, C H, W G, J W, J S, H N, J T, J S, G Z, W C, B X, X Z, M S are responsible  
474 for carrying out recruitment, managing the treatment of the patients and collecting data. W L, Z T, L  
475 K, J Z, W M and W H, X P, M C, C H, W G, J W, J S, H N, J T, J S, G Z, W C, B X, X Z, M S  
476 are members of the trial steering committee. J Z, L K, Z T and T C drafted the manuscript.

477 **Competing interests**

478 This study is supported by SBE2016750187 of Science and technology project, Jiangsu Province,  
479 China. SciClone Pharmaceuticals provides the study drug for this investigator-initiated study but  
480 has no influence on the study design, data analysis, or report. The investigators take full  
481 responsibility for the integrity and content of this paper.

482 **Funding:**

483 This study is funded by SBE2016750187 of Science and technology project, Jiangsu Province,  
484 China, partly by SciClone Pharmaceuticals Holding Limited. The sponsor had no role in study  
485 design, data collection, and interpretation, or in the decision to submit the manuscript for publication.

486 *Consent for publication*

487 Not Applicable.

488

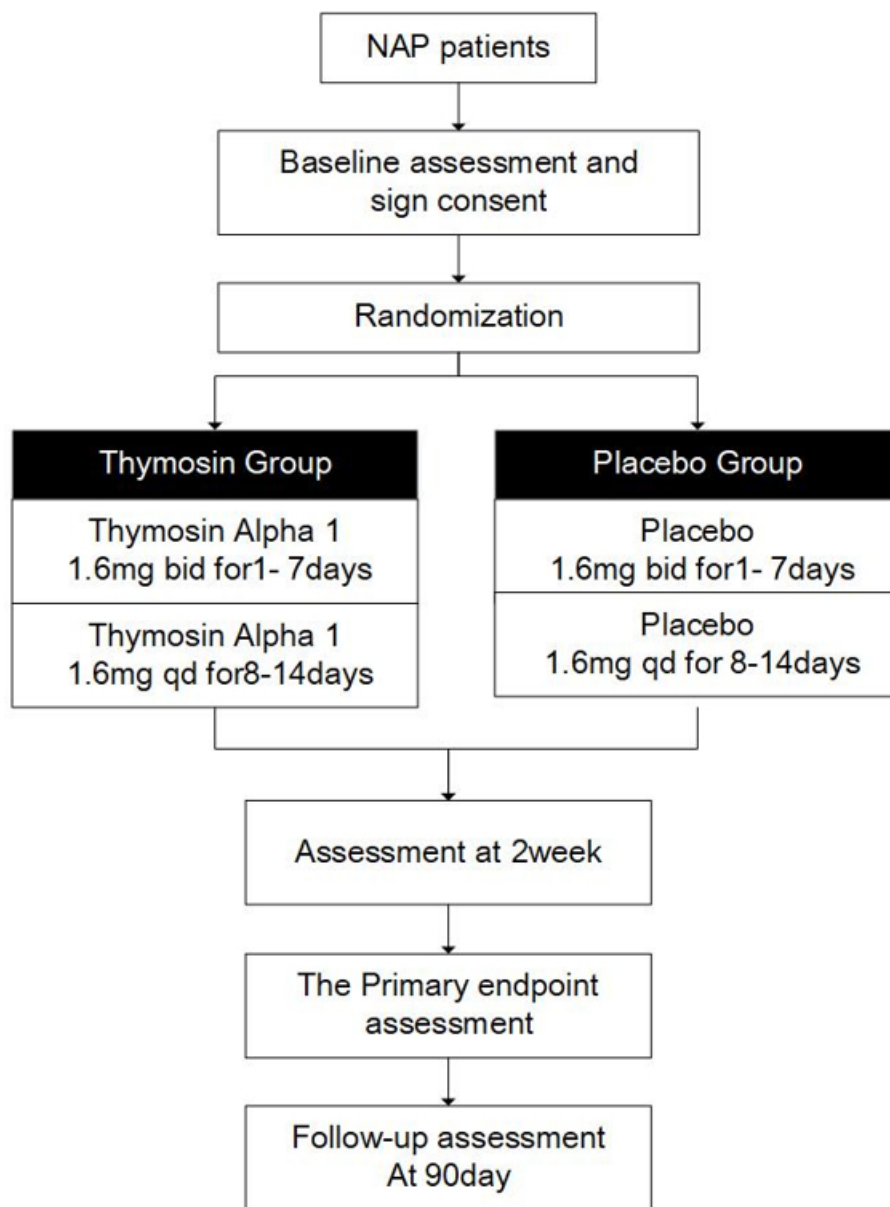

Figure 1 : Trial flow chart.

1  
2  
3  
4  
5  
6  
7  
8  
9  
10  
11  
12  
13  
14  
15  
16  
17  
18  
19  
20  
21  
22  
23  
24  
25  
26  
27  
28  
29  
30  
31  
32  
33  
34  
35  
36  
37  
38  
39  
40  
41  
42  
43  
44  
45  
46  
47  
48  
49  
50  
51  
52  
53  
54  
55  
56  
57  
58  
59  
60

| TIMEPOINT                        | Study period |            |                 |      |         |       |                 |           |
|----------------------------------|--------------|------------|-----------------|------|---------|-------|-----------------|-----------|
|                                  | Enrollment   | Allocation | Index admission |      |         |       |                 | Follow-up |
|                                  | <24h         | 0          | day1-6          | day7 | day8-13 | day14 | discharge/death | 90 day    |
| ENROLLMENT                       |              |            |                 |      |         |       |                 |           |
| Eligibility screening            | X            |            |                 |      |         |       |                 |           |
| Informed consent                 | X            |            |                 |      |         |       |                 |           |
| Allocation                       |              | X          |                 |      |         |       |                 |           |
| INTERVENTIONS:                   |              |            |                 |      |         |       |                 |           |
| Drug Injection 1.6mg bid         |              |            | X               | X    |         |       |                 |           |
| Drug injection 1.6mg qd          |              |            |                 |      | X       | X     |                 |           |
| ASSESSMENTS:                     |              |            |                 |      |         |       |                 |           |
| Incidence of IPN                 |              |            | ←————→          |      |         |       |                 |           |
| Major complications              |              |            | ←————→          |      |         |       |                 |           |
| Laboratory test                  | X            |            |                 | X    |         | X     |                 |           |
| Organ failure assessment         | X            |            |                 | X    |         | X     |                 |           |
| Status of vitality and infection |              |            |                 |      |         |       |                 | X         |

Figure 2. Schedule for participants enrolment, drug administration, and data collection.

# Jinling Hospital, Nanjing University

## CONSENT FORM

**TITLE OF STUDY:** Thymosin alpha 1 in the prevention of infected pancreatic necrosis following acute necrotizing pancreatitis

**PRINCIPAL INVESTIGATOR:** Weiqin Li, M.D.

We are conducting a clinical trial (a type of research study). Clinical trials include only patients who choose to take part in the study. This consent form serves two purposes. First, it provides information on the procedures and risks involved in the clinical trial, so that you can decide if you want to take part in the study.

Second, this form will ask for your permission to use and release the medical information that we will get from you during this study. Please take your time to make your decision about taking part. You may discuss your decision with your friends and family. If you have any questions, you can ask the study doctor for more explanation.

This study is being sponsored by Jinling Hospital of Nanjing University. You are being asked to take part in this study because you were admitted to Jinling Hospital with acute necrotizing pancreatitis (ANP).

### WHY IS THIS STUDY BEING DONE?

Infected pancreatic necrosis (IPN) and its related septic complications are the major causes of death in patients with ANP. Our previous study found that Thymosin alpha 1 is associated with improved cellular immunity and reduced infection rate in a group of ANP patients. However, no further study was published yet, and the clinical significance of this study is limited due to the small sample size and single-center nature. Therefore, we conduct a multicenter, randomized study with a sufficiently-powered sample size and proper design to evaluate the efficacy and safety of Thymosin Alpha 1 in treating ANP.

It is planned that a total of 520 people will take part in this study from 10-20 hospitals within China.

### WHAT WILL HAPPEN IN THE STUDY?

Version 2.0 (5/20/2016 )

Page 1 of 5

Patient Initials \_\_\_\_\_

1  
2  
3  
4  
5  
6 You will be "randomized" into one of the study groups described below.  
7  
8 Randomization means that you are put into a group by chance. It is like flipping a coin.  
9  
10 Neither you nor the study doctor will choose what group you will be in. You will have an  
11  
12 equal chance of being placed in either group.

13 Group 1 will receive Thymosin Alpha 1(ZADAXIN) 1.6mg I.H q12h for the first seven  
14  
15 days and 1.6mg I.H, qd for the following seven days. Group 2 will receive a matching  
16  
17 placebo (normal saline) using the same mode of administration, as mentioned above. The  
18  
19 administration will be terminated any day during the treatment when the patient deemed as  
20  
21 qualified for discharge

22 You will be in the study until you are discharged from the hospital. However, You can  
23  
24 stop being a part of this study at any time. If you decide to stop being in the study, please  
25  
26 talk to the study doctor first.

## 27 **WHAT ARE THE RISKS OF THE STUDY?**

28  
29 While on the study, you are at risk for the following side effects. You should discuss  
30  
31 these with the study doctor. We will be looking at your medical records up to 90 days  
32  
33 after "randomization." If you are discharged before that, you will be contacted by phone.

34 Risks and side effects related to the study drug(Thymosin Alpha 1) and  
35  
36 placebo(normal saline) include:

- 37
- 38 • primarily local discomfort at the injection site
- 39
- 40 • rare instances of erythema
- 41
- 42 • transient muscle atrophy
- 43
- 44 • polyarthralgia combined with hand edema,
- 45
- 46 • skin rash

47 There also may be other side effects that we cannot predict. These side effects are often  
48  
49 manageable and reversible. You will be observed for side effects, and all medically  
50  
51 appropriate efforts will be made to prevent and/or control them. If there are side effects that  
52  
53 cannot be controlled or reversed, they may result in serious injury or death. You should  
54  
55 report any of these problems to the study doctor immediately so that appropriate care can be  
56  
57 given. Side effects other than those listed here may also occur. Talk to the study doctors  
58  
59 about any side effects that seems unusual or that is especially bothersome to you.

## **ARE THERE BENEFITS TO TAKING PART IN THE STUDY?**

If you agree to take part in this study, you are free to use the Thymosin Alpha 1(ZADAXIN)/placebo provided by Sciclone Pharmaceuticals (CHINA). Besides, you will experience improved access to medical care, more efficient medical evaluation, and management. The results of this study could help future patients with your condition.

## **WHAT ARE THE COSTS?**

Taking part in this study will not lead to added costs to you or your insurance company. The trial drug and related immune system laboratory tests will be provided free of charge. The sponsor will not pay for routine costs required during hospitalization.

While you are in this study, you may receive tests, procedures, and exams that are standard medical care. This standard medical care may or may not be covered by your medical insurance. If your medical insurance does not pay for this standard medical care, you will be responsible for the cost of medical care related to your condition.

## **COMPENSATION?**

You will receive no payment for taking part in this study.

## **WHAT ABOUT CONFIDENTIALITY?**

Only the medical information that will be collected from you if you take part in this study. Date masking will be performed to protect your Identification information from divulging. The medical information are as follows:

- Information obtained from procedures used to determine your eligibility to take part in the study, including a routine medical history, physical exam, and laboratory data.
- Information that is created or collected from you during your participation in the study, including your overall medical condition and follow-up information up to 90 days after randomization.
- Information contained in your underlying medical records related to your medical history and treatment prior to this study

Only the hospitals involved in the study may inspect and/or copy your research records for quality assurance and data analysis.

## **DO I HAVE THE RIGHT TO DECLINE AUTHORIZATION?**

Version 2.0 (5/20/2016 )

Page 3 of 5

Patient Initials \_\_\_\_\_

1  
2  
3  
4  
5  
6 You have the right to decline to sign this authorization to use/disclose your medical  
7 information. If you decline, you will not be able to take part in this research study.  
8 Except as described herein, if you decline to sign this authorization, your rights  
9 concerning treatment, payment for services, enrollment in a health plan, or eligibility for  
10 benefits will not be affected. The authorization for use and disclosure of your  
11 information will remain in effect until the study is complete.  
12  
13  
14  
15  
16  
17

## 18 **WHAT ARE MY RIGHTS AS A PARTICIPANT?**

19  
20 Your doctor has answered your questions. You can ask your doctor questions at any  
21 time. Taking part in this study is voluntary. You may choose not to take part, or you  
22 may leave the study at any time. Leaving the study will not result in any penalty or loss  
23 of benefits to which you are entitled. We will tell you about the important new  
24 information that may affect your health, welfare, and willingness to stay in this study.  
25  
26  
27  
28  
29  
30  
31  
32  
33  
34  
35  
36  
37  
38  
39  
40  
41  
42  
43  
44  
45  
46  
47  
48  
49  
50  
51  
52  
53  
54  
55  
56  
57  
58  
59  
60



## STATEMENT OF CONSENT AND AUTHORIZATION

I hereby freely and voluntarily consent to take part in the research study described above. This consent is given based on the verbal and written information provided and the understanding that I am medically and physically qualified to take part in this study. I am free to ask questions at any time.

I have the option to decline to take part or to withdraw from the study at any time without incurring any penalty or loss of benefits otherwise available, including medical care at this institution.

My signature below indicates that I voluntarily agree to take part in this study and that I authorize the use and disclosure of my information in connection with the study. I will receive a signed copy of this consent and authorization form.

|                                |       |       |
|--------------------------------|-------|-------|
| _____                          | _____ | _____ |
| Patient Signature*             | Date  | Time  |
| _____                          | _____ | _____ |
| Research Coordinator Signature | Date  | Time  |
| _____                          | _____ | _____ |
| Investigator Signature         | Date  | Time  |

\*If this consent is signed by a legal representative of the patient, check applicable box below explaining your authority to sign for the patient. For legal representatives acting in the capacity as a parent/guardian to the patient, attach a copy of documentation giving you the authority to sign this consent form on behalf of the patient.

- Next of Kin
- Parent (patient is a minor)
- Guardian
- Other relationship: \_\_\_\_\_

|                                                             |       |       |
|-------------------------------------------------------------|-------|-------|
| _____                                                       | _____ | _____ |
| Signature of Patient's Legally<br>Authorized Representative | Date  | Time  |
| _____                                                       | _____ | _____ |
| Witness to consent process(if applicable)                   | Date  | Time  |

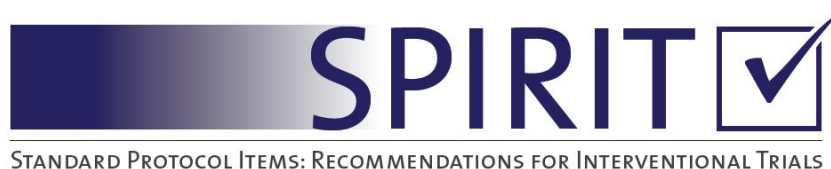

SPIRIT 2013 Checklist: Recommended items to address in a clinical trial protocol and related documents\*

| Section/item                      | Item No | Description                                                                                                                                                                                                                                                                              | page/line numbers |
|-----------------------------------|---------|------------------------------------------------------------------------------------------------------------------------------------------------------------------------------------------------------------------------------------------------------------------------------------------|-------------------|
| <b>Administrative information</b> |         |                                                                                                                                                                                                                                                                                          |                   |
| Title                             | 1       | Descriptive title identifying the study design, population, interventions, and, if applicable, trial acronym                                                                                                                                                                             | P1/L1-4           |
| Trial registration                | 2a      | Trial identifier and registry name. If not yet registered, name of intended registry                                                                                                                                                                                                     | P3/L76-77         |
|                                   | 2b      | All items from the World Health Organization Trial Registration Data Set                                                                                                                                                                                                                 |                   |
| Protocol version                  | 3       | Date and version identifier                                                                                                                                                                                                                                                              |                   |
| Funding                           | 4       | Sources and types of financial, material, and other support                                                                                                                                                                                                                              | P17/L481-484      |
| Roles and responsibilities        | 5a      | Names, affiliations, and roles of protocol contributors                                                                                                                                                                                                                                  | P1/L5-46          |
|                                   | 5b      | Name and contact information for the trial sponsor                                                                                                                                                                                                                                       | P2/L47-51         |
|                                   | 5c      | Role of study sponsor and funders, if any, in study design; collection, management, analysis, and interpretation of data; writing of the report; and the decision to submit the report for publication, including whether they will have ultimate authority over any of these activities | P17/L469-474      |
|                                   | 5d      | Composition, roles, and responsibilities of the coordinating centre, steering committee, endpoint adjudication committee, data management team, and other individuals or groups overseeing the trial, if applicable (see Item 21a for data monitoring committee)                         | P6/L141-147       |
| <b>Introduction</b>               |         |                                                                                                                                                                                                                                                                                          |                   |
| Background and rationale          | 6a      | Description of research question and justification for undertaking the trial, including summary of relevant studies (published and unpublished) examining benefits and harms for each intervention                                                                                       | P5/L92-127        |
|                                   | 6b      | Explanation for choice of comparators                                                                                                                                                                                                                                                    | P5/L92-127        |

|    |                                                           |     |                                                                                                                                                                                                                                                                                                                                                                                |                            |
|----|-----------------------------------------------------------|-----|--------------------------------------------------------------------------------------------------------------------------------------------------------------------------------------------------------------------------------------------------------------------------------------------------------------------------------------------------------------------------------|----------------------------|
| 1  |                                                           |     |                                                                                                                                                                                                                                                                                                                                                                                |                            |
| 2  | Objectives                                                | 7   | Specific objectives or hypotheses                                                                                                                                                                                                                                                                                                                                              | P6/L130-133                |
| 3  |                                                           |     |                                                                                                                                                                                                                                                                                                                                                                                |                            |
| 4  | Trial design                                              | 8   | Description of trial design including type of trial (eg, parallel group, crossover, factorial, single group), allocation ratio, and framework (eg, superiority, equivalence, noninferiority, exploratory)                                                                                                                                                                      | P6/L136-137<br>P8/L182-184 |
| 5  |                                                           |     |                                                                                                                                                                                                                                                                                                                                                                                |                            |
| 6  |                                                           |     |                                                                                                                                                                                                                                                                                                                                                                                |                            |
| 7  |                                                           |     |                                                                                                                                                                                                                                                                                                                                                                                |                            |
| 8  |                                                           |     |                                                                                                                                                                                                                                                                                                                                                                                |                            |
| 9  |                                                           |     |                                                                                                                                                                                                                                                                                                                                                                                |                            |
| 10 | <b>Methods: Participants, interventions, and outcomes</b> |     |                                                                                                                                                                                                                                                                                                                                                                                |                            |
| 11 |                                                           |     |                                                                                                                                                                                                                                                                                                                                                                                |                            |
| 12 | Study setting                                             | 9   | Description of study settings (eg, community clinic, academic hospital) and list of countries where data will be collected. Reference to where list of study sites can be obtained                                                                                                                                                                                             | P6/L138-140                |
| 13 |                                                           |     |                                                                                                                                                                                                                                                                                                                                                                                |                            |
| 14 |                                                           |     |                                                                                                                                                                                                                                                                                                                                                                                |                            |
| 15 |                                                           |     |                                                                                                                                                                                                                                                                                                                                                                                |                            |
| 16 | Eligibility criteria                                      | 10  | Inclusion and exclusion criteria for participants. If applicable, eligibility criteria for study centres and individuals who will perform the interventions (eg, surgeons, psychotherapists)                                                                                                                                                                                   | P7/L154-179                |
| 17 |                                                           |     |                                                                                                                                                                                                                                                                                                                                                                                |                            |
| 18 |                                                           |     |                                                                                                                                                                                                                                                                                                                                                                                |                            |
| 19 |                                                           |     |                                                                                                                                                                                                                                                                                                                                                                                |                            |
| 20 |                                                           |     |                                                                                                                                                                                                                                                                                                                                                                                |                            |
| 21 | Interventions                                             | 11a | Interventions for each group with sufficient detail to allow replication, including how and when they will be administered                                                                                                                                                                                                                                                     | P8/L194-206                |
| 22 |                                                           |     |                                                                                                                                                                                                                                                                                                                                                                                |                            |
| 23 |                                                           |     |                                                                                                                                                                                                                                                                                                                                                                                |                            |
| 24 |                                                           | 11b | Criteria for discontinuing or modifying allocated interventions for a given trial participant (eg, drug dose change in response to harms, participant request, or improving/worsening disease)                                                                                                                                                                                 | P12/L327-331               |
| 25 |                                                           |     |                                                                                                                                                                                                                                                                                                                                                                                |                            |
| 26 |                                                           |     |                                                                                                                                                                                                                                                                                                                                                                                |                            |
| 27 |                                                           |     |                                                                                                                                                                                                                                                                                                                                                                                |                            |
| 28 |                                                           | 11c | Strategies to improve adherence to intervention protocols, and any procedures for monitoring adherence (eg, drug tablet return, laboratory tests)                                                                                                                                                                                                                              | P10/L255-256               |
| 29 |                                                           |     |                                                                                                                                                                                                                                                                                                                                                                                |                            |
| 30 |                                                           |     |                                                                                                                                                                                                                                                                                                                                                                                |                            |
| 31 |                                                           |     |                                                                                                                                                                                                                                                                                                                                                                                |                            |
| 32 |                                                           |     |                                                                                                                                                                                                                                                                                                                                                                                |                            |
| 33 |                                                           | 11d | Relevant concomitant care and interventions that are permitted or prohibited during the trial                                                                                                                                                                                                                                                                                  | P8/L209-221                |
| 34 |                                                           |     |                                                                                                                                                                                                                                                                                                                                                                                |                            |
| 35 |                                                           |     |                                                                                                                                                                                                                                                                                                                                                                                |                            |
| 36 | Outcomes                                                  | 12  | Primary, secondary, and other outcomes, including the specific measurement variable (eg, systolic blood pressure), analysis metric (eg, change from baseline, final value, time to event), method of aggregation (eg, median, proportion), and time point for each outcome. Explanation of the clinical relevance of chosen efficacy and harm outcomes is strongly recommended | P9/L224-261                |
| 37 |                                                           |     |                                                                                                                                                                                                                                                                                                                                                                                |                            |
| 38 |                                                           |     |                                                                                                                                                                                                                                                                                                                                                                                |                            |
| 39 |                                                           |     |                                                                                                                                                                                                                                                                                                                                                                                |                            |
| 40 |                                                           |     |                                                                                                                                                                                                                                                                                                                                                                                |                            |
| 41 |                                                           |     |                                                                                                                                                                                                                                                                                                                                                                                |                            |
| 42 |                                                           |     |                                                                                                                                                                                                                                                                                                                                                                                |                            |
| 43 |                                                           |     |                                                                                                                                                                                                                                                                                                                                                                                |                            |
| 44 | Participant timeline                                      | 13  | Time schedule of enrolment, interventions (including any run-ins and washouts), assessments, and visits for participants. A schematic diagram is highly recommended (see Figure)                                                                                                                                                                                               | P16/L452                   |
| 45 |                                                           |     |                                                                                                                                                                                                                                                                                                                                                                                |                            |
| 46 |                                                           |     |                                                                                                                                                                                                                                                                                                                                                                                |                            |
| 47 |                                                           |     |                                                                                                                                                                                                                                                                                                                                                                                |                            |
| 48 |                                                           |     |                                                                                                                                                                                                                                                                                                                                                                                |                            |
| 49 | Sample size                                               | 14  | Estimated number of participants needed to achieve study objectives and how it was determined, including clinical and statistical assumptions supporting any sample size calculations                                                                                                                                                                                          | P10/L264-268               |
| 50 |                                                           |     |                                                                                                                                                                                                                                                                                                                                                                                |                            |
| 51 |                                                           |     |                                                                                                                                                                                                                                                                                                                                                                                |                            |
| 52 |                                                           |     |                                                                                                                                                                                                                                                                                                                                                                                |                            |
| 53 | Recruitment                                               | 15  | Strategies for achieving adequate participant enrolment to reach target sample size                                                                                                                                                                                                                                                                                            | P12/L310-312               |
| 54 |                                                           |     |                                                                                                                                                                                                                                                                                                                                                                                |                            |
| 55 |                                                           |     |                                                                                                                                                                                                                                                                                                                                                                                |                            |

### Methods: Assignment of interventions (for controlled trials)

Allocation:

|    |                                                           |     |                                                                    |              |
|----|-----------------------------------------------------------|-----|--------------------------------------------------------------------|--------------|
| 1  |                                                           |     |                                                                    |              |
| 2  | Sequence                                                  | 16a | Method of generating the allocation sequence (eg, computer-        | P8/L184-185  |
| 3  | generation                                                |     | generated random numbers), and list of any factors for             |              |
| 4  |                                                           |     | stratification. To reduce predictability of a random sequence,     |              |
| 5  |                                                           |     | details of any planned restriction (eg, blocking) should be        |              |
| 6  |                                                           |     | provided in a separate document that is unavailable to those       |              |
| 7  |                                                           |     | who enrol participants or assign interventions                     |              |
| 8  |                                                           |     |                                                                    |              |
| 9  |                                                           |     |                                                                    |              |
| 10 | Allocation                                                | 16b | Mechanism of implementing the allocation sequence (eg,             | P8/L187-190  |
| 11 | concealment                                               |     | central telephone; sequentially numbered, opaque, sealed           |              |
| 12 | mechanism                                                 |     | envelopes), describing any steps to conceal the sequence until     |              |
| 13 |                                                           |     | interventions are assigned                                         |              |
| 14 |                                                           |     |                                                                    |              |
| 15 | Implementation                                            | 16c | Who will generate the allocation sequence, who will enrol          | P8/L184-191  |
| 16 |                                                           |     | participants, and who will assign participants to interventions    |              |
| 17 |                                                           |     |                                                                    |              |
| 18 |                                                           |     |                                                                    |              |
| 19 | Blinding                                                  | 17a | Who will be blinded after assignment to interventions (eg, trial   | P8/L186-189  |
| 20 | (masking)                                                 |     | participants, care providers, outcome assessors, data              |              |
| 21 |                                                           |     | analysts), and how                                                 |              |
| 22 |                                                           |     |                                                                    |              |
| 23 |                                                           | 17b | If blinded, circumstances under which unblinding is                | P12/L332-334 |
| 24 |                                                           |     | permissible, and procedure for revealing a participant's           |              |
| 25 |                                                           |     | allocated intervention during the trial                            |              |
| 26 |                                                           |     |                                                                    |              |
| 27 |                                                           |     |                                                                    |              |
| 28 | <b>Methods: Data collection, management, and analysis</b> |     |                                                                    |              |
| 29 |                                                           |     |                                                                    |              |
| 30 | Data collection                                           | 18a | Plans for assessment and collection of outcome, baseline, and      | P12/L319-327 |
| 31 | methods                                                   |     | other trial data, including any related processes to promote       |              |
| 32 |                                                           |     | data quality (eg, duplicate measurements, training of              |              |
| 33 |                                                           |     | assessors) and a description of study instruments (eg,             |              |
| 34 |                                                           |     | questionnaires, laboratory tests) along with their reliability and |              |
| 35 |                                                           |     | validity, if known. Reference to where data collection forms can   |              |
| 36 |                                                           |     | be found, if not in the protocol                                   |              |
| 37 |                                                           |     |                                                                    |              |
| 38 |                                                           |     |                                                                    |              |
| 39 |                                                           | 18b | Plans to promote participant retention and complete follow-up,     | P12/L327-331 |
| 40 |                                                           |     | including list of any outcome data to be collected for             |              |
| 41 |                                                           |     | participants who discontinue or deviate from intervention          |              |
| 42 |                                                           |     | protocols                                                          |              |
| 43 |                                                           |     |                                                                    |              |
| 44 |                                                           |     |                                                                    |              |
| 45 | Data                                                      | 19  | Plans for data entry, coding, security, and storage, including     | P12/L319-326 |
| 46 | management                                                |     | any related processes to promote data quality (eg, double data     |              |
| 47 |                                                           |     | entry; range checks for data values). Reference to where           |              |
| 48 |                                                           |     | details of data management procedures can be found, if not in      |              |
| 49 |                                                           |     | the protocol                                                       |              |
| 50 |                                                           |     |                                                                    |              |
| 51 |                                                           |     |                                                                    |              |
| 52 | Statistical                                               | 20a | Statistical methods for analysing primary and secondary            | P11/L272-287 |
| 53 | methods                                                   |     | outcomes. Reference to where other details of the statistical      |              |
| 54 |                                                           |     | analysis plan can be found, if not in the protocol                 |              |
| 55 |                                                           |     |                                                                    |              |
| 56 |                                                           | 20b | Methods for any additional analyses (eg, subgroup and              | P11/L288-293 |
| 57 |                                                           |     | adjusted analyses)                                                 |              |
| 58 |                                                           |     |                                                                    |              |
| 59 |                                                           |     |                                                                    |              |
| 60 |                                                           |     |                                                                    |              |

1  
2 20c Definition of analysis population relating to protocol non- P11/L277-284  
3 adherence (eg, as randomised analysis), and any statistical  
4 methods to handle missing data (eg, multiple imputation)  
5

6 **Methods: Monitoring**  
7

8 Data monitoring 21a Composition of data monitoring committee (DMC); summary of P6/L145-147  
9 its role and reporting structure; statement of whether it is  
10 independent from the sponsor and competing interests; and  
11 reference to where further details about its charter can be  
12 found, if not in the protocol. Alternatively, an explanation of  
13 why a DMC is not needed  
14  
15 21b Description of any interim analyses and stopping guidelines, P11/L288  
16 including who will have access to these interim results and  
17 make the final decision to terminate the trial  
18  
19 Harms 22 Plans for collecting, assessing, reporting, and managing P11/L296-305  
20 solicited and spontaneously reported adverse events and other  
21 unintended effects of trial interventions or trial conduct  
22  
23 Auditing 23 Frequency and procedures for auditing trial conduct, if any, P12/L307  
24 and whether the process will be independent from investigators  
25 and the sponsor  
26  
27  
28  
29

30 **Ethics and dissemination**  
31

32 Research ethics 24 Plans for seeking research ethics committee/institutional P13/L337-350  
33 approval  
34  
35 Protocol 25 Plans for communicating important protocol modifications (eg, Not applicable  
36 amendments outcomes, analyses) to relevant  
37 parties (eg, investigators, REC/IRBs, trial participants, trial  
38 registries, journals, regulators)  
39  
40  
41 Consent or assent 26a Who will obtain informed consent or assent from potential trial P13/L353-356  
42 participants or authorised surrogates, and how (see Item 32)  
43  
44 26b Additional consent provisions for collection and use of Detail in  
45 participant data and biological specimens in ancillary studies, if informed  
46 applicable consent form  
47  
48  
49 Confidentiality 27 How personal information about potential and enrolled Detail in  
50 participants will be collected, shared, and maintained in order informed  
51 to protect confidentiality before, during, and after the trial consent form  
52  
53  
54 Declaration of 28 Financial and other competing interests for principal P17/L476-479  
55 interests investigators for the overall trial and each study site  
56  
57  
58  
59  
60

|    |                               |     |                                                                                                                                                                                                                                                                                     |                                 |
|----|-------------------------------|-----|-------------------------------------------------------------------------------------------------------------------------------------------------------------------------------------------------------------------------------------------------------------------------------------|---------------------------------|
| 1  |                               |     |                                                                                                                                                                                                                                                                                     |                                 |
| 2  | Access to data                | 29  | Statement of who will have access to the final trial dataset, and disclosure of contractual agreements that limit such access for investigators                                                                                                                                     | Detail in informed consent form |
| 3  |                               |     |                                                                                                                                                                                                                                                                                     |                                 |
| 4  |                               |     |                                                                                                                                                                                                                                                                                     |                                 |
| 5  |                               |     |                                                                                                                                                                                                                                                                                     |                                 |
| 6  | Ancillary and post-trial care | 30  | Provisions, if any, for ancillary and post-trial care, and for compensation to those who suffer harm from trial participation                                                                                                                                                       | Detail in informed consent form |
| 7  |                               |     |                                                                                                                                                                                                                                                                                     |                                 |
| 8  |                               |     |                                                                                                                                                                                                                                                                                     |                                 |
| 9  |                               |     |                                                                                                                                                                                                                                                                                     |                                 |
| 10 |                               |     |                                                                                                                                                                                                                                                                                     |                                 |
| 11 | Dissemination policy          | 31a | Plans for investigators and sponsor to communicate trial results to participants, healthcare professionals, the public, and other relevant groups (eg, via publication, reporting in results databases, or other data sharing arrangements), including any publication restrictions | P12/L349-350                    |
| 12 |                               |     |                                                                                                                                                                                                                                                                                     |                                 |
| 13 |                               |     |                                                                                                                                                                                                                                                                                     |                                 |
| 14 |                               |     |                                                                                                                                                                                                                                                                                     |                                 |
| 15 |                               |     |                                                                                                                                                                                                                                                                                     |                                 |
| 16 |                               |     |                                                                                                                                                                                                                                                                                     |                                 |
| 17 |                               |     |                                                                                                                                                                                                                                                                                     |                                 |
| 18 |                               | 31b | Authorship eligibility guidelines and any intended use of professional writers                                                                                                                                                                                                      | Not applicable                  |
| 19 |                               |     |                                                                                                                                                                                                                                                                                     |                                 |
| 20 |                               |     |                                                                                                                                                                                                                                                                                     |                                 |
| 21 |                               | 31c | Plans, if any, for granting public access to the full protocol, participant-level dataset, and statistical code                                                                                                                                                                     | Not applicable                  |
| 22 |                               |     |                                                                                                                                                                                                                                                                                     |                                 |
| 23 |                               |     |                                                                                                                                                                                                                                                                                     |                                 |
| 24 |                               |     |                                                                                                                                                                                                                                                                                     |                                 |
| 25 | <b>Appendices</b>             |     |                                                                                                                                                                                                                                                                                     |                                 |
| 26 | Informed consent materials    | 32  | Model consent form and other related documentation given to participants and authorised surrogates                                                                                                                                                                                  | See supplement materials        |
| 27 |                               |     |                                                                                                                                                                                                                                                                                     |                                 |
| 28 |                               |     |                                                                                                                                                                                                                                                                                     |                                 |
| 29 |                               |     |                                                                                                                                                                                                                                                                                     |                                 |
| 30 |                               |     |                                                                                                                                                                                                                                                                                     |                                 |
| 31 | Biological specimens          | 33  | Plans for collection, laboratory evaluation, and storage of biological specimens for genetic or molecular analysis in the current trial and for future use in ancillary studies, if applicable                                                                                      | Not applicable                  |
| 32 |                               |     |                                                                                                                                                                                                                                                                                     |                                 |
| 33 |                               |     |                                                                                                                                                                                                                                                                                     |                                 |
| 34 |                               |     |                                                                                                                                                                                                                                                                                     |                                 |

\*It is strongly recommended that this checklist be read in conjunction with the SPIRIT 2013 Explanation & Elaboration for important clarification on the items. Amendments to the protocol should be tracked and dated. The SPIRIT checklist is copyrighted by the SPIRIT Group under the Creative Commons "[Attribution-NonCommercial-NoDerivs 3.0 Unported](https://creativecommons.org/licenses/by-nc-nd/3.0/)" license.
